# Supplementary material for: Multiple photoluminescence of spiro[acridine-fluorene]-based o-carboranyl compounds with potential as a visual sensory material
Source: Royal Society of Chemistry journal article supplement (doi:10.1039/d0tc03801f), 2020-01-01
Supplement: d0tc03801f1.pdf [file d0tc03801f1.pdf]

## Electronic Supplementary Information

### Multiple Photoluminescence of Spiro[acridine-fluorene]-based *o*-Carboranyl Compounds and Potential as a Visual Sensory Material

Min Sik Mun,<sup>‡</sup><sup>a</sup> Chan Hee Ryu,<sup>‡</sup><sup>a</sup> Hyunhee So<sup>a</sup>, Mingi Kim<sup>a</sup>, Ji Hye Lee<sup>a</sup>, Hyonseok Hwang<sup>a</sup>,  
and Kang Mun Lee<sup>\*a</sup>

<sup>a</sup> Department of Chemistry, Institute for Molecular Science and Fusion Technology,  
Kangwon National University, Chuncheon 24341, Republic of Korea

<sup>‡</sup> The first and second authors contributed equally to this work.

#### Contents

|                                                                                                                              |         |
|------------------------------------------------------------------------------------------------------------------------------|---------|
| Detailed synthetic procedures and spectroscopic data for <b>SA</b> , <i>p</i> - <b>BrSA</b> and <i>o</i> - <b>BrSA</b> ..... | S2–S3   |
| NMR and HR-mass spectra for <i>p</i> - <b>SAC</b> , <i>o</i> - <b>SAC</b> and their precursors.....                          | S4–S12  |
| Crystallographic data and parameters for <i>o</i> - <b>SAC</b> .....                                                         | S13     |
| Selected bond lengths (Å) and angles (°) for <i>o</i> - <b>SAC</b> .....                                                     | S14     |
| UV-vis absorption and PL spectra for <b>SA</b> in THF.....                                                                   | S15     |
| Excitation graphs in THF solution for <i>p</i> - <b>SAC</b> and <i>o</i> - <b>SAC</b> .....                                  | S15     |
| UV-vis absorption and PL spectra of <i>p</i> - <b>SAC</b> in various organic solvents.....                                   | S16     |
| Emission decay curves for <i>p</i> - <b>SAC</b> and <i>o</i> - <b>SAC</b> .....                                              | S17     |
| Dynamic light scattering data for <i>o</i> - <b>SAC</b> in acetonitrile at 20 °C.....                                        | S18     |
| Theoretical calculation details for <i>p</i> - <b>SAC</b> and <i>o</i> - <b>SAC</b> .....                                    | S19–S24 |
| Cartesian coordinates of <i>p</i> - <b>SAC</b> and <i>o</i> - <b>SAC</b> in each optimized geometry.....                     | S25–S28 |

**General synthetic method for 10-phenyl-10H-spiro[acridine-9,9'-fluorene] (SA) and bromo-10-phenyl-10H-spiro[acridine-9,9'-fluorene] precursors (*p*-BrSA and *o*-BrSA)**

*n*-BuLi (1.6 M in *n*-hexane) was added dropwise to a THF solution (100 mL) of 2-bromo-*N,N*-diphenylaniline at  $-78\text{ }^{\circ}\text{C}$ . The reaction mixture was stirred for 1 h. The THF solutions (10 mL) of either 9H-fluoren-9-one (for SA) or bromo-9H-fluoren-9-one (for *p*-BrSA and *o*-BrSA) were added dropwise to the reaction mixture. The solution was stirred for 1 h at  $-78\text{ }^{\circ}\text{C}$ , after which the mixture was slowly heated to  $25\text{ }^{\circ}\text{C}$  and stirred for 20 h. The mixture was quenched using a saturated aqueous NaCl solution (100 mL) and extracted with diethyl ether (50 mL  $\times$  3). The organic layer was dried over MgSO<sub>4</sub>. The volatiles were removed via rotary evaporation to produce a pale gray residue. The crude product was used *in situ* without any purification, where it was dissolved in an acidic mixture solvent of acetic acid and saturated aqueous hydrochloric acid solution (v/v = 10/1, 77 mL). The acid solution was stirred and refluxed for 2 h at  $100\text{ }^{\circ}\text{C}$  and cooled to ambient temperature. Saturated aqueous NaHCO<sub>3</sub> solution (100 mL) was slowly added and the reaction mixture was extracted with saturated aqueous NaHCO<sub>3</sub> solution (50 mL  $\times$  3) and CHCl<sub>3</sub> (50 mL  $\times$  3). The organic layer was dried over MgSO<sub>4</sub>. The volatiles were removed via rotary evaporation to produce an ivory residue. The remaining solid was purified via column chromatography on silica (DCM/*n*-hexane = 1/4, v/v) to produce solid bromo-precursors.

**Data for 10-phenyl-10H-spiro[acridine-9,9'-fluorene], SA**

*n*-BuLi (1.9 mL, 3.0 mmol), 2-bromo-*N,N*-diphenylaniline (0.74 g, 2.3 mmol) and 9H-fluoren-9-one (0.50 g, 2.8 mmol) afforded SA as a white solid. Yield = 59 % (0.55 g). <sup>1</sup>H NMR (CD<sub>2</sub>Cl<sub>2</sub>):  $\delta$  7.90 (d, *J* = 7.5 Hz, 2H), 7.79 (t, *J* = 8.0 Hz, 2H), 7.65 (t, *J* = 8.1 Hz, 1H), 7.57 (d, *J* = 7.9 Hz, 2H), 7.48 (d, *J* = 8.0 Hz, 2H), 7.46 (t, *J* = 8.2 Hz, 2H), 7.34 (td, *J* = 7.5, 1.1 Hz, 2H), 6.97 (td, *J* = 8.6, 1.6 Hz, 2H), 6.61 (td, *J* = 7.9, 1.2 Hz, 2H), 6.43 (d, *J* = 8.0 Hz, 4H). <sup>13</sup>C NMR (CD<sub>2</sub>Cl<sub>2</sub>):  $\delta$  156.62, 141.44, 141.03, 139.27, 131.17, 131.16, 128.57, 128.41, 127.75, 127.48, 127.29, 125.58, 124.78, 120.45, 120.10, 114.81, 56.86 (spiro-C). Anal. Calcd for C<sub>31</sub>H<sub>21</sub>N: C, 91.37; H, 5.19; N, 3.44. Found: C, 91.02; H, 5.05; N, 3.20.

**Data for 2'-bromo10-phenyl-10H-spiro[acridine-9,9'-fluorene], *p*-BrSA**

*n*-BuLi (8.1 mL, 13.0 mmol), 2-bromo-*N,N*-diphenylaniline (3.2 g, 10.0 mmol) and 2-bromo-9*H*-fluoren-9-one (2.2 g, 12.0 mmol) afforded *p*-BrSA as a white solid. Yield = 52 % (2.5 g). <sup>1</sup>H NMR (CDCl<sub>3</sub>): δ 7.79 (d, *J* = 8.2 Hz, 1H), 7.73 (t, *J* = 8.4 Hz, 2H), 7.67 (d, *J* = 8.2 Hz, 1H), 7.59 (m, 2H), 7.51 (m, 3H), 7.41 (m, 2H), 7.31 (td, *J* = 8.0, 2.4 Hz, 1H), 6.95 (t, *J* = 8.1 Hz, 2H), 6.60 (t, 7.4 Hz, 2H), 6.40 (dd, *J* = 12.5, 8.1 Hz, 4H). <sup>13</sup>C NMR (CDCl<sub>3</sub>): δ 158.55, 156.29, 141.31, 140.96, 138.40, 138.15, 131.23, 130.94, 129.13, 128.92, 128.65, 127.90, 127.82, 127.57, 126.07, 123.99, 121.94, 121.41, 120.73, 120.05, 114.92, 57.01 (spiro-*C*). Anal. Calcd for C<sub>31</sub>H<sub>20</sub>BrN: C, 76.55; H, 4.14; N, 2.88. Found: C, 76.34; H, 4.01; N, 2.78.

**Data for 4'-bromo10-phenyl-10H-spiro[acridine-9,9'-fluorene], *o*-BrSA**

*n*-BuLi (5.2 mL, 8.3 mmol), 2-bromo-*N,N*-diphenylaniline (2.2 g, 6.4 mmol) and 4-bromo-9*H*-fluoren-9-one (2.0 g, 7.7 mmol) afforded *o*-BrSA as a white solid. Yield = 73 % (2.3 g). <sup>1</sup>H NMR (CDCl<sub>3</sub>): δ 8.65 (m, *J* = 8.4 Hz, 1H), 7.71 (t, *J* = 8.2 Hz, 2H), 7.58 (t, *J* = 7.0 Hz, 1H), 7.50 (t, *J* = 8.2 Hz, 3H), 7.45 (d, *J* = 4.1 Hz, 1H), 7.43 (t, *J* = 2.3 Hz, 1H), 7.38 (d, *J* = 8.2 Hz, 1H), 7.34 (t, *J* = 8.6 Hz, 1H), 7.09 (t, *J* = 7.7 Hz, 1H), 6.93 (td, *J* = 8.5, 1.6 Hz, 2H), 6.57 (td, *J* = 7.6, 1.2 Hz, 2H), 6.39 (dd, *J* = 12.0, 4.2 Hz, 2H) 6.35 (dd, *J* = 12.6, 8.1, 4H). <sup>13</sup>C NMR (CDCl<sub>3</sub>): δ 159.68, 156.98, 141.22, 141.01, 138.73, 137.32, 132.43, 131.23, 131.20, 129.33, 129.14, 128.62, 127.95, 127.49, 127.45, 125.96, 124.90, 124.33, 123.48, 120.67, 116.73, 114.84, 56.88 (spiro-*C*). Anal. Calcd for C<sub>31</sub>H<sub>20</sub>BrN: C, 76.55; H, 4.14; N, 2.88. Found: C, 76.40; H, 4.12; N, 2.82.

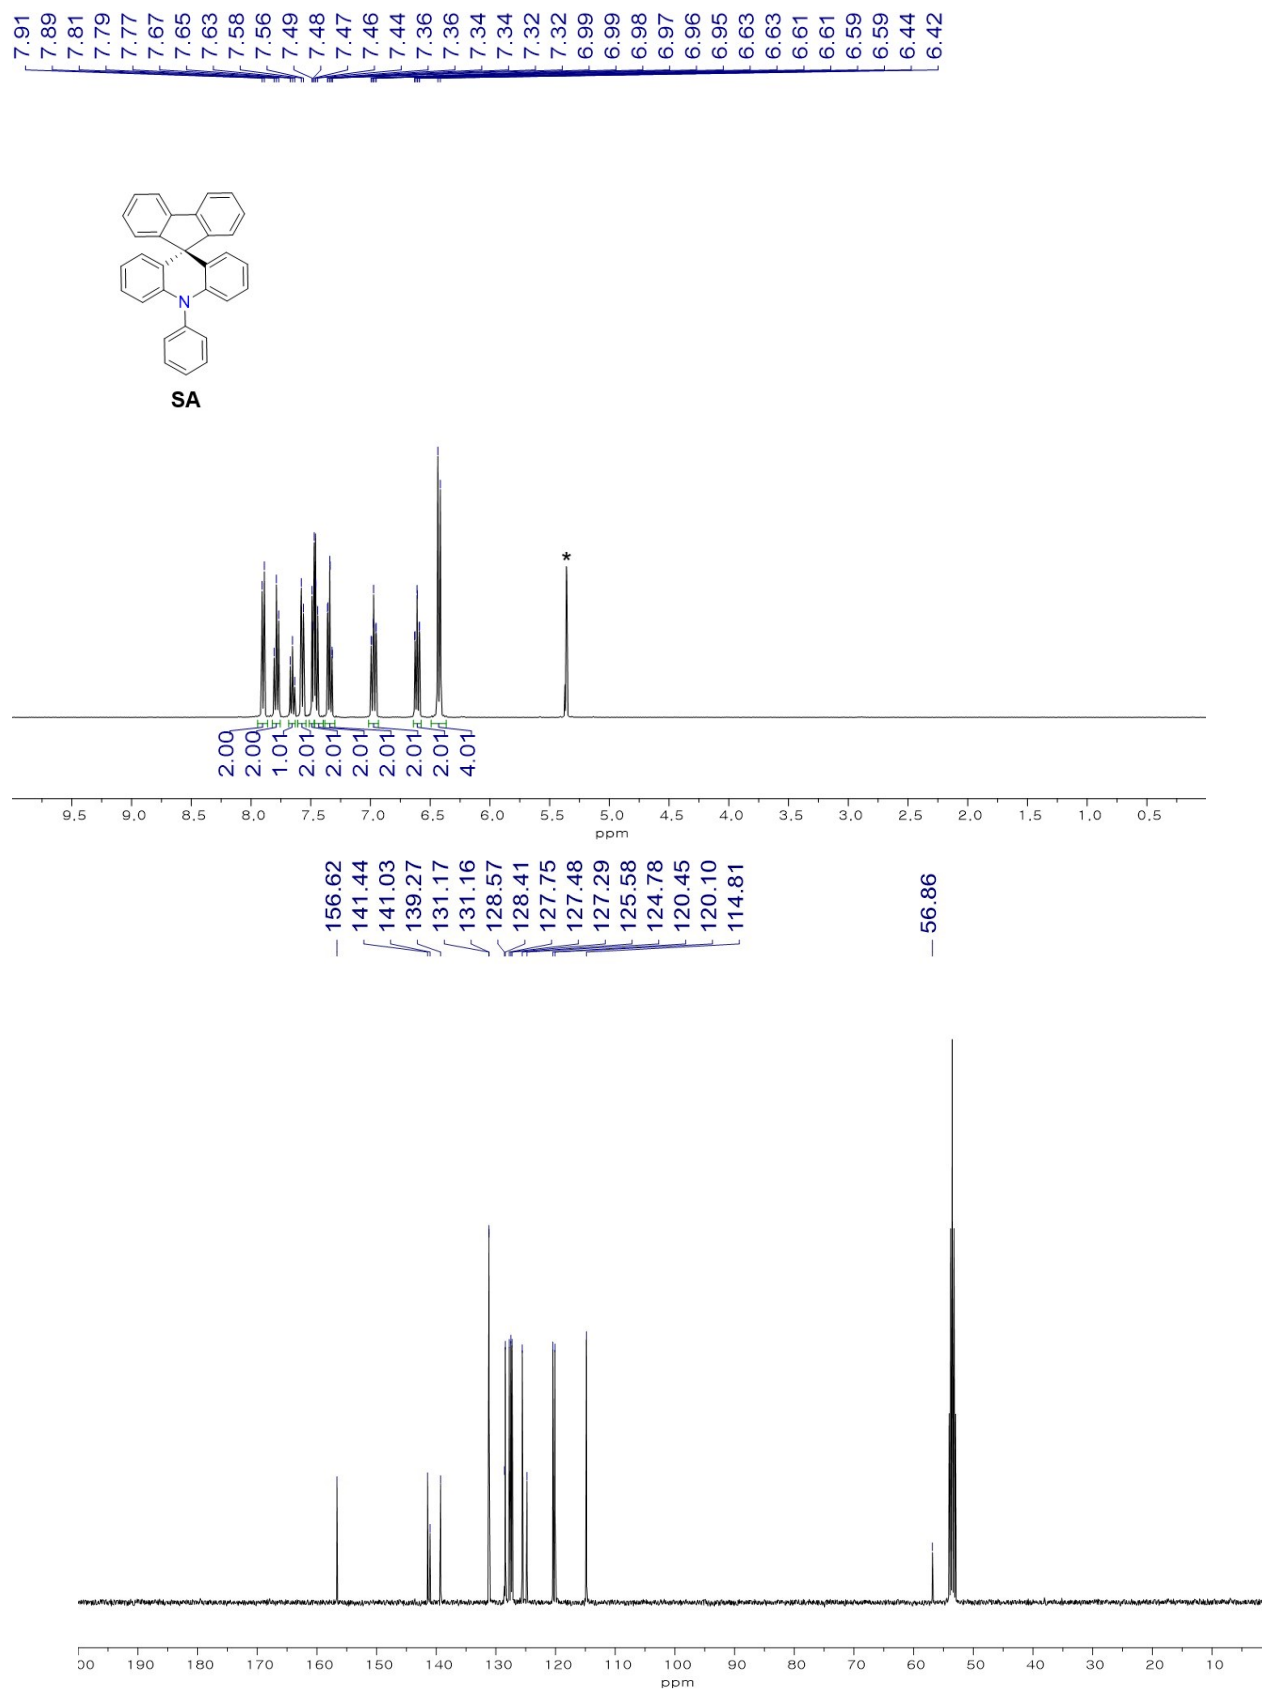

**Fig. S1** <sup>1</sup>H (top) and <sup>13</sup>C (bottom) NMR spectra of SA (\* from residual CH<sub>2</sub>Cl<sub>2</sub> in CD<sub>2</sub>Cl<sub>2</sub>).

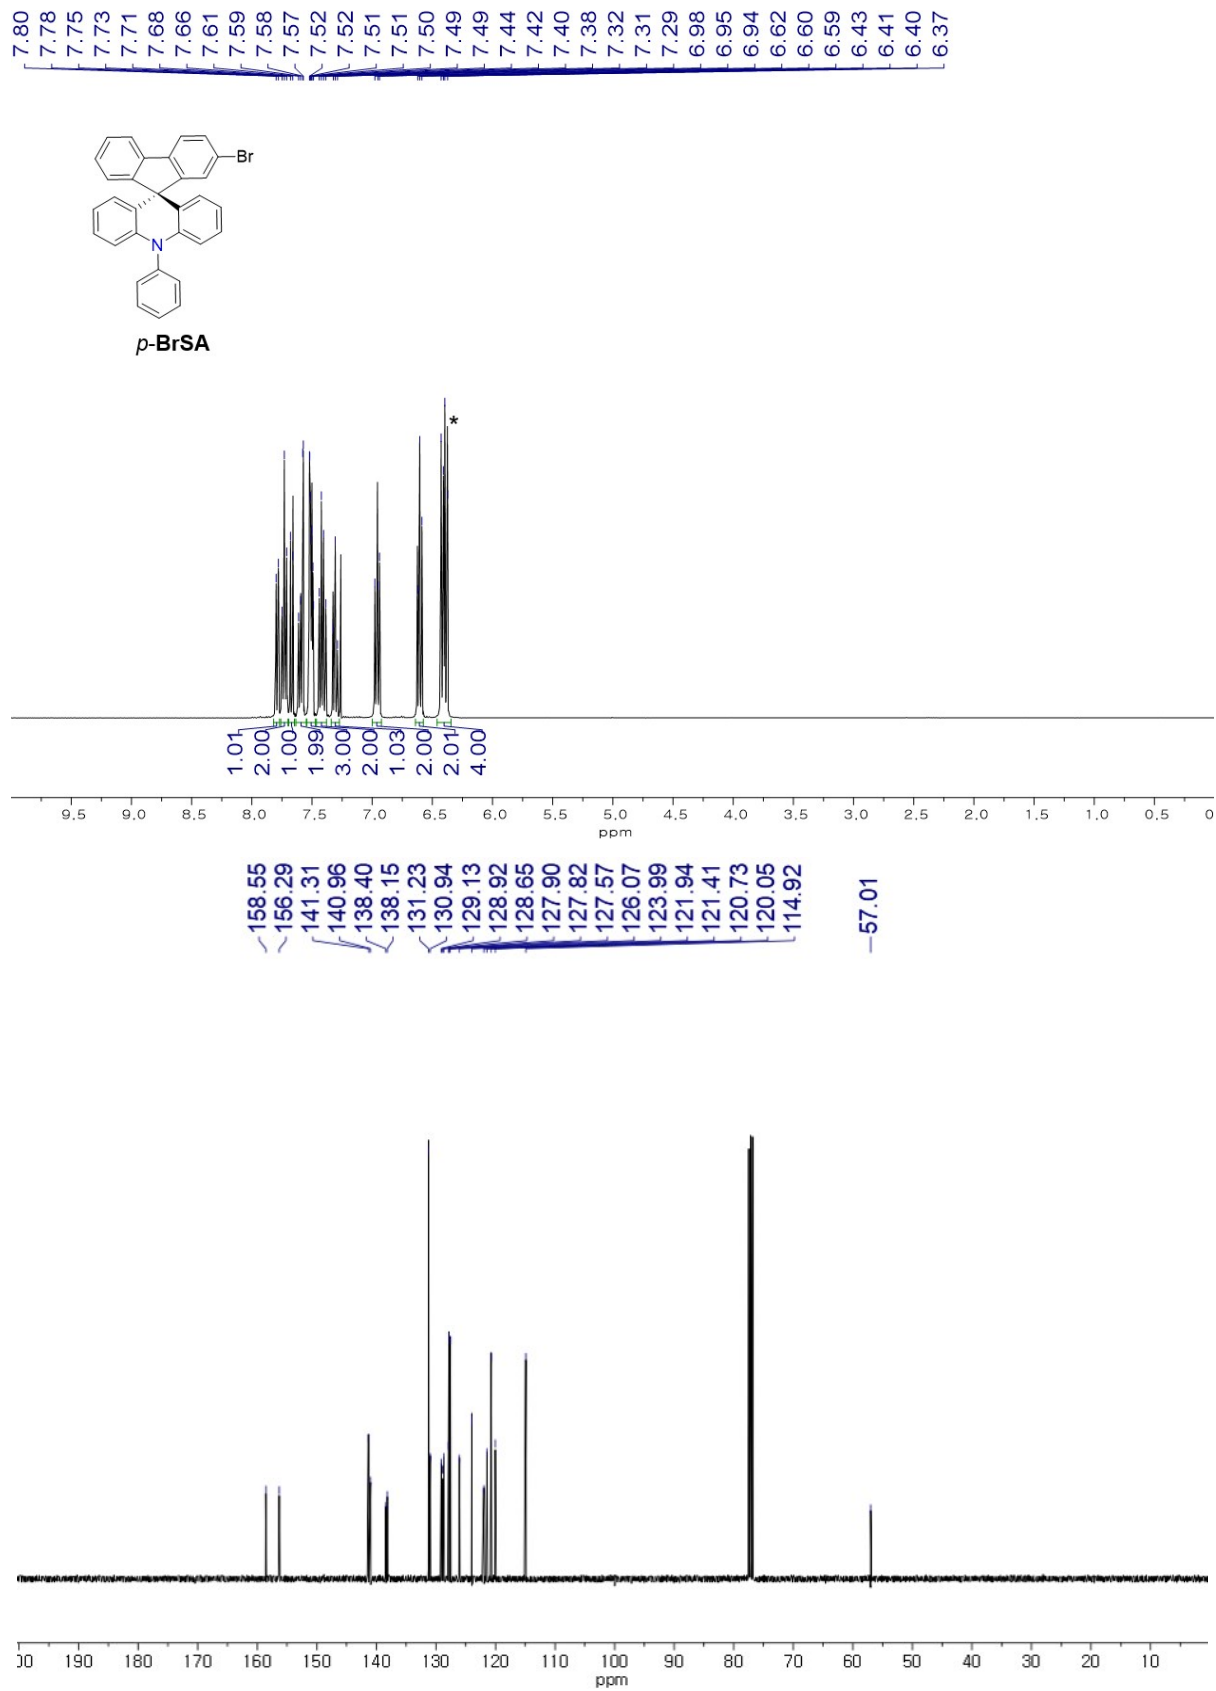

**Fig. S2** <sup>1</sup>H (top) and <sup>13</sup>C (bottom) NMR spectra of *p*-BrSA (\* from residual CHCl<sub>3</sub> in CDCl<sub>3</sub>).

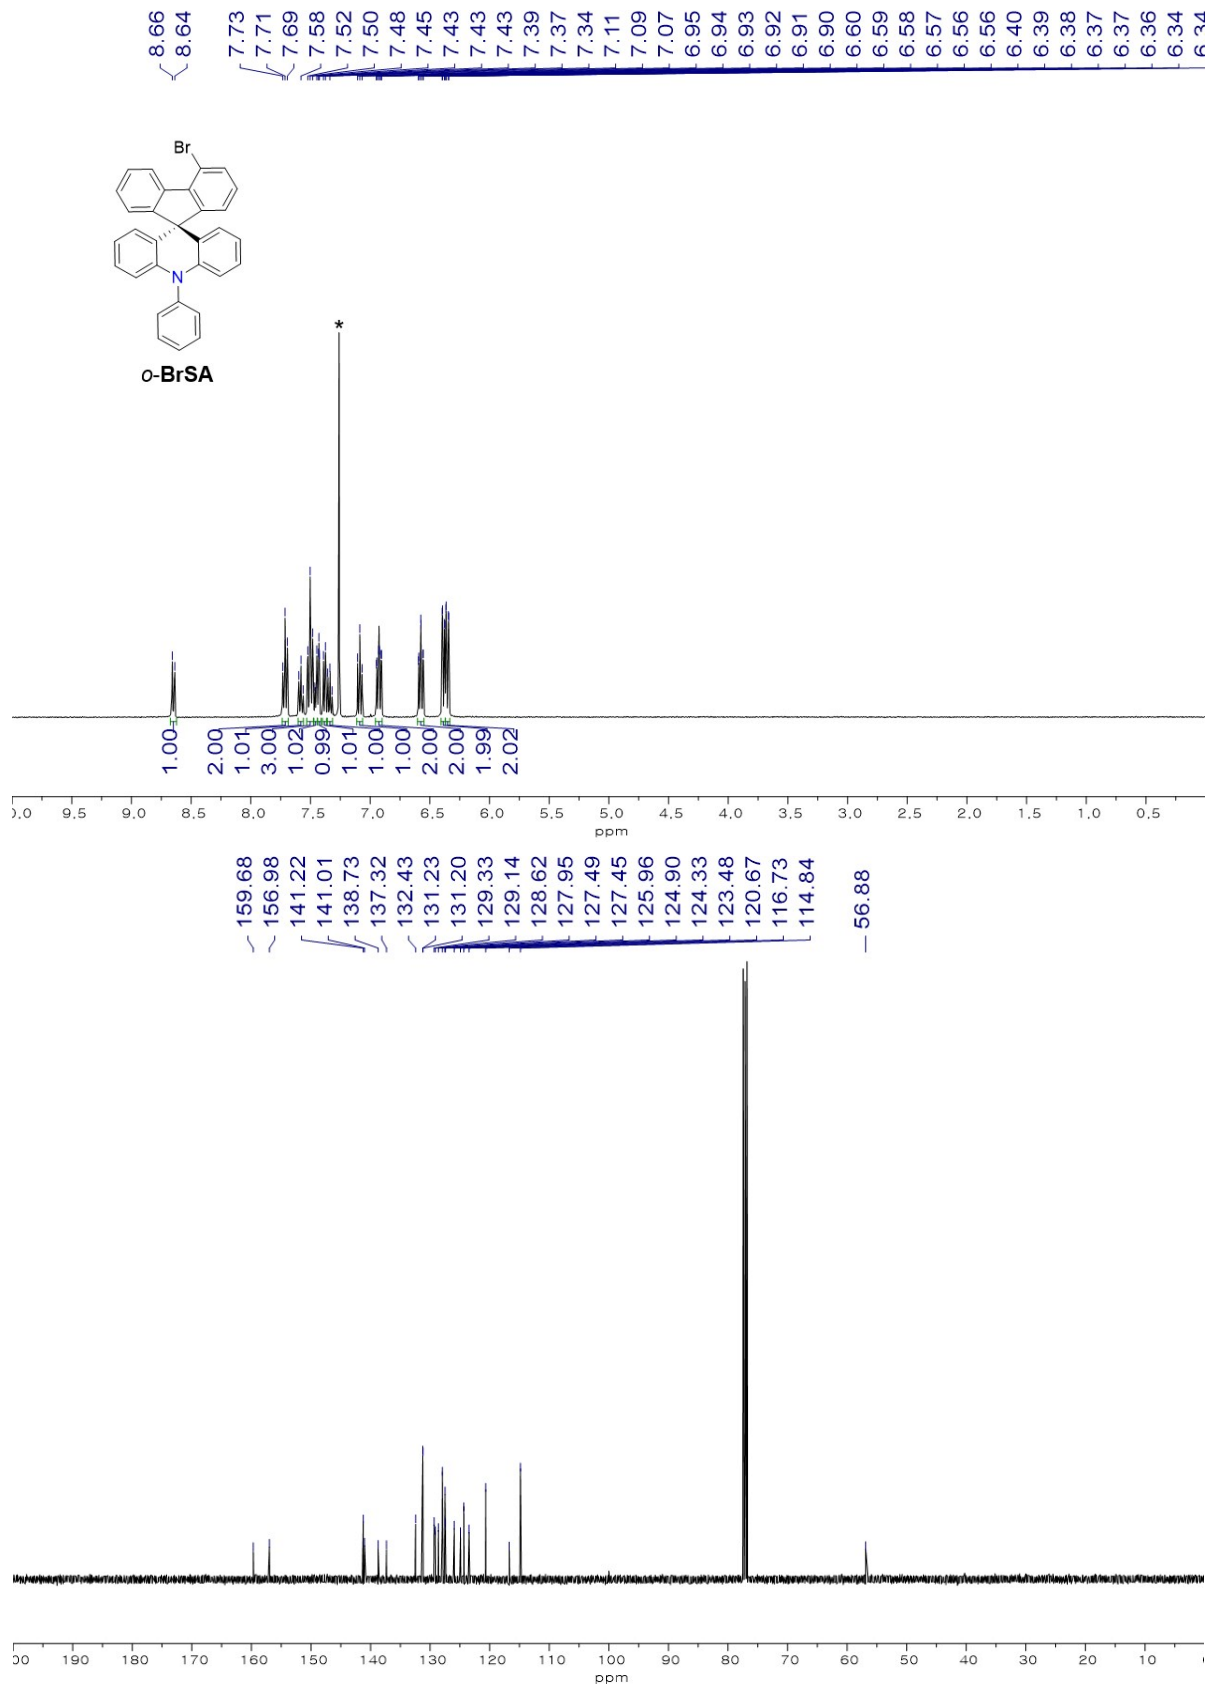

**Fig. S3** <sup>1</sup>H (top) and <sup>13</sup>C (bottom) NMR spectra of *o*-BrSA (\* from residual CHCl<sub>3</sub> in CDCl<sub>3</sub>).

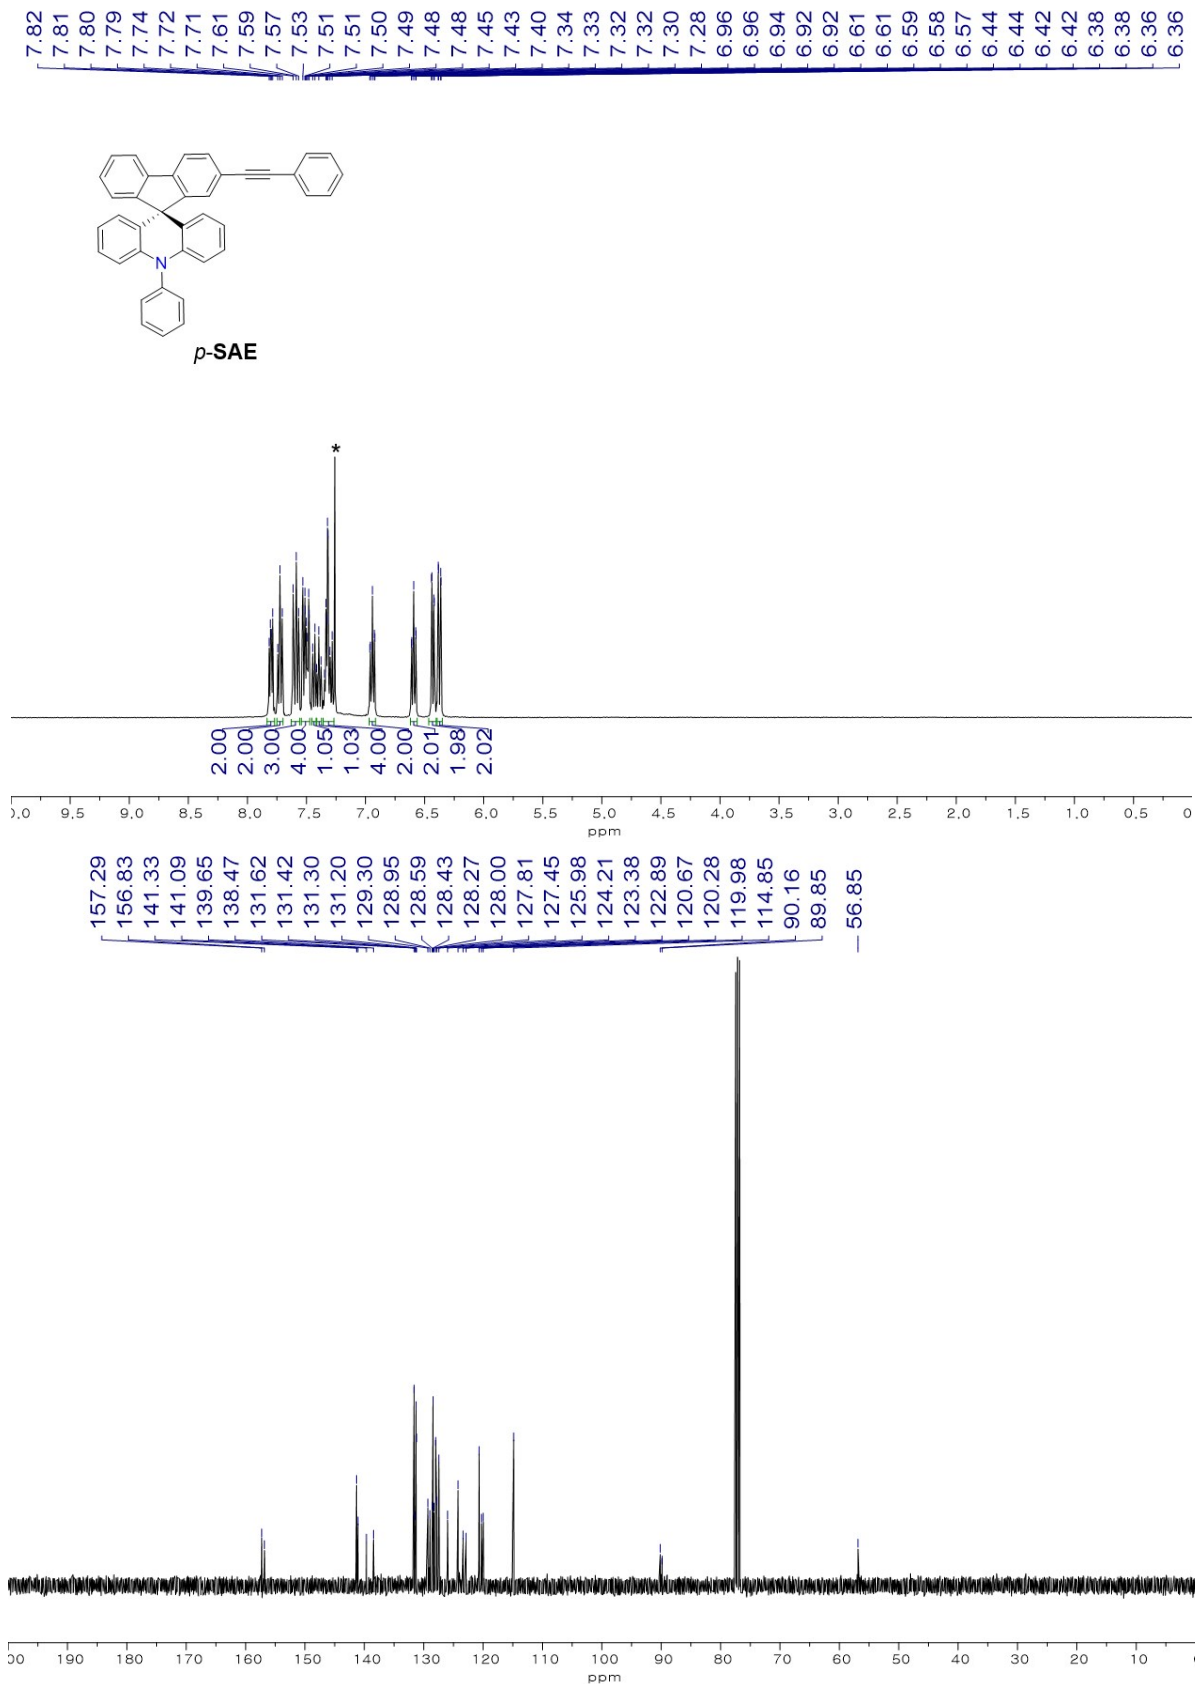

Fig. S4 <sup>1</sup>H (top) and <sup>13</sup>C (bottom) NMR spectra of *p*-SAE (\* from residual CHCl<sub>3</sub> in CDCl<sub>3</sub>).

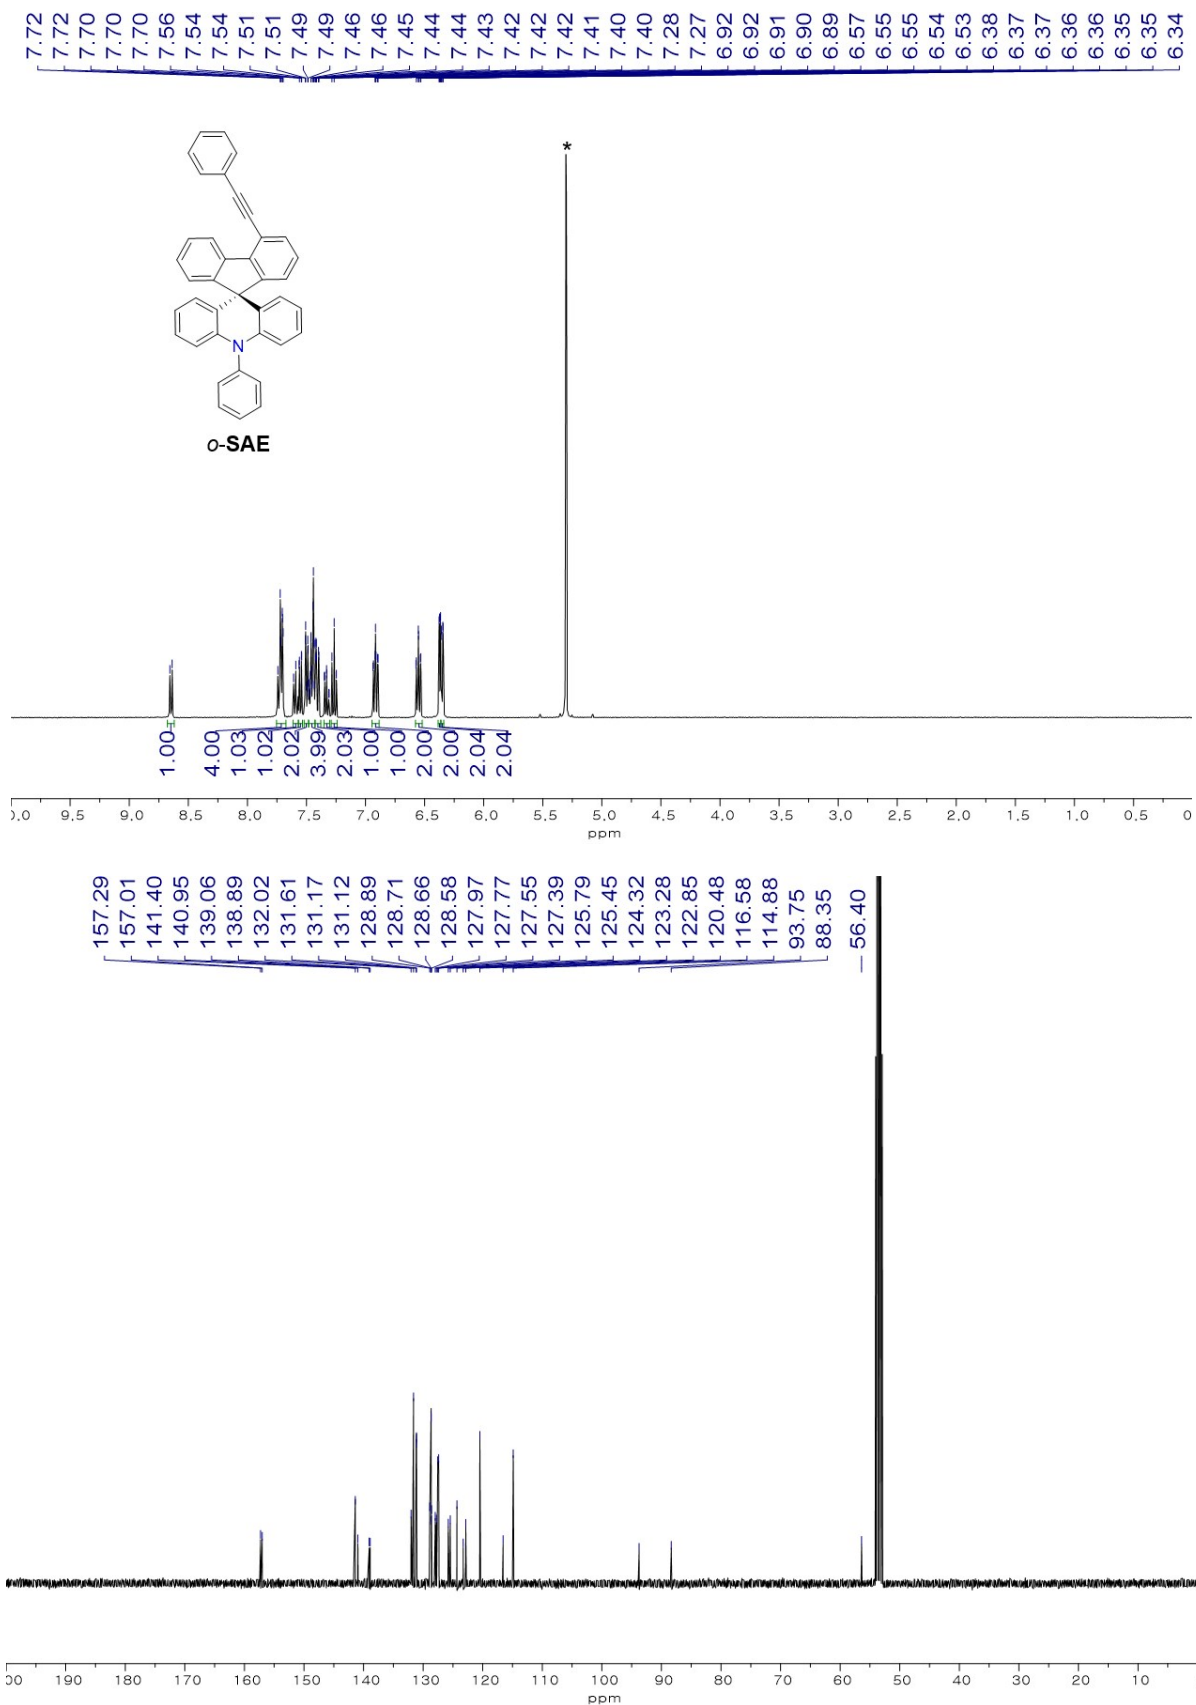

**Fig. S5** <sup>1</sup>H (top) and <sup>13</sup>C (bottom) NMR spectra of *o*-SAE (\* from residual CH<sub>2</sub>Cl<sub>2</sub> in CD<sub>2</sub>Cl<sub>2</sub>).



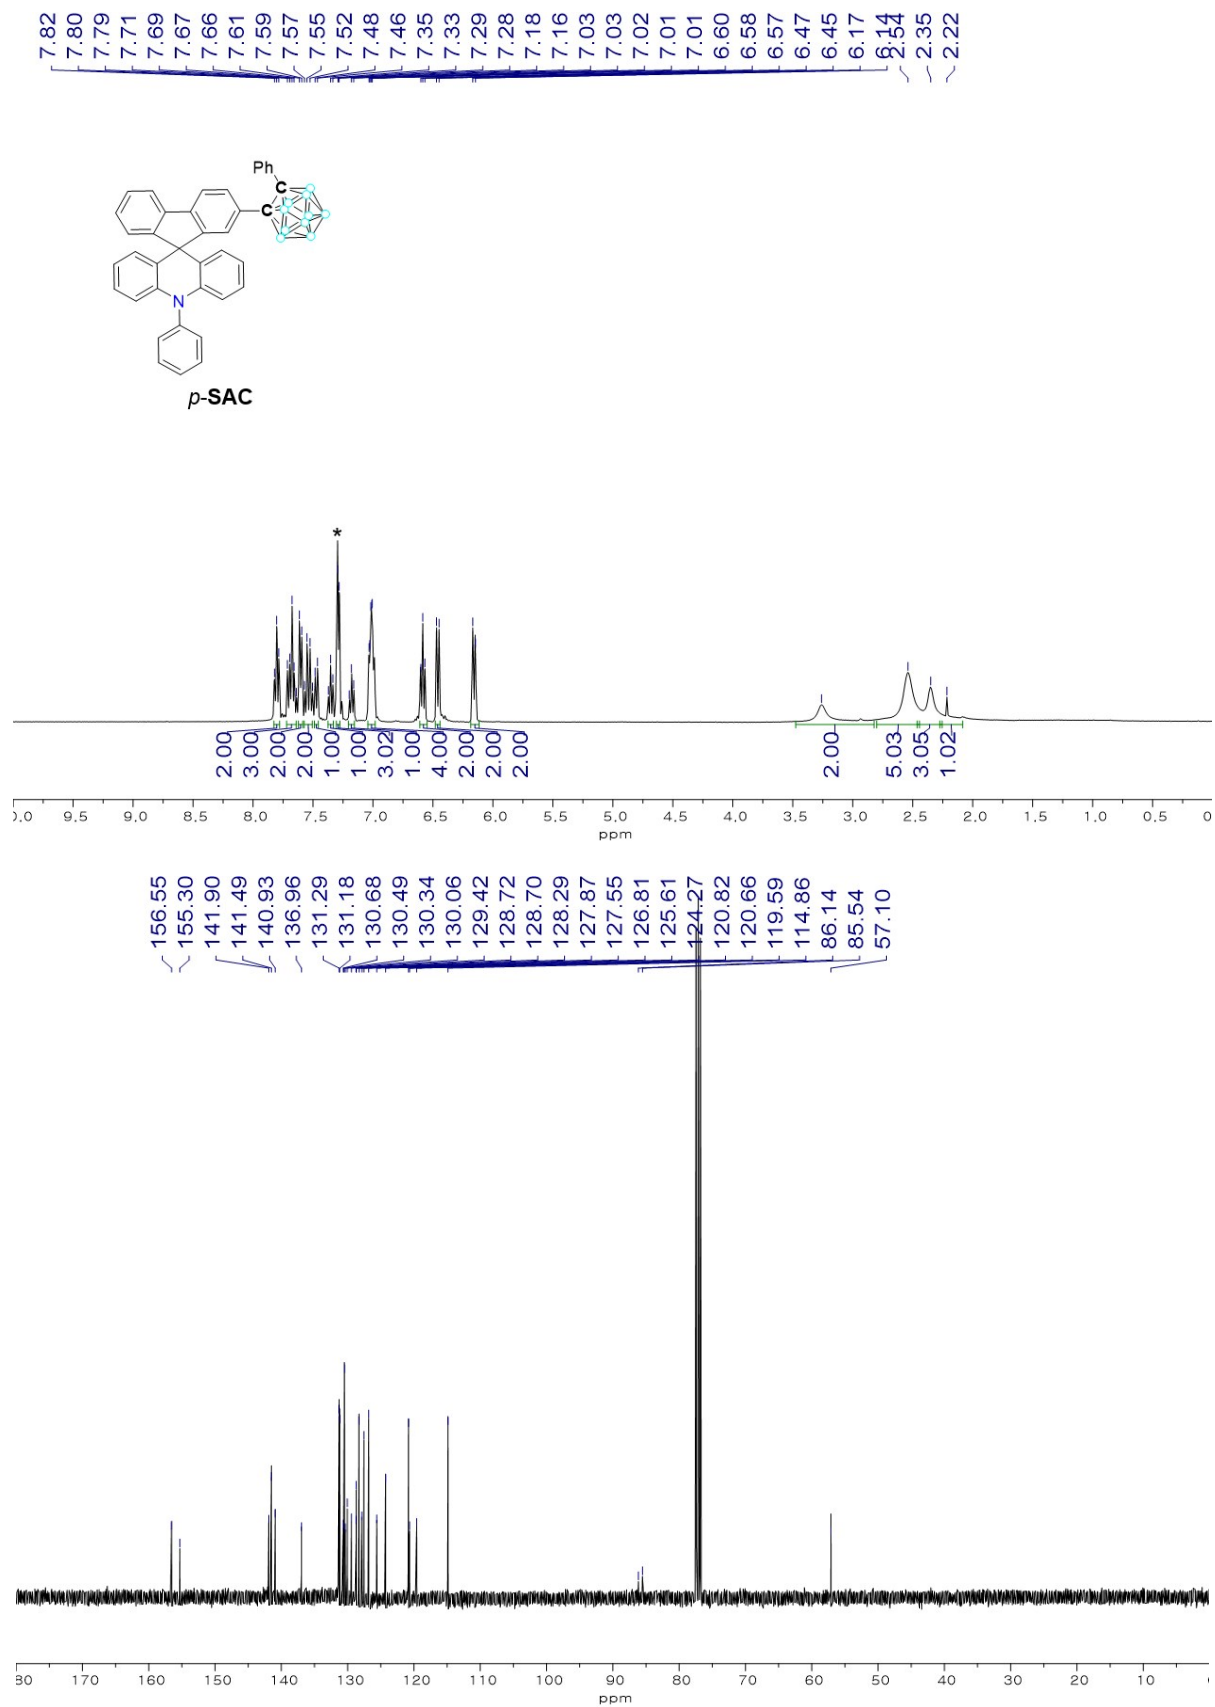

**Fig. S6**  $^1\text{H}\{^{11}\text{B}\}$  (top) and  $^{13}\text{C}$  (bottom) NMR spectra of *p*-SAC (\* from residual  $\text{CHCl}_3$  in  $\text{CDCl}_3$ ).

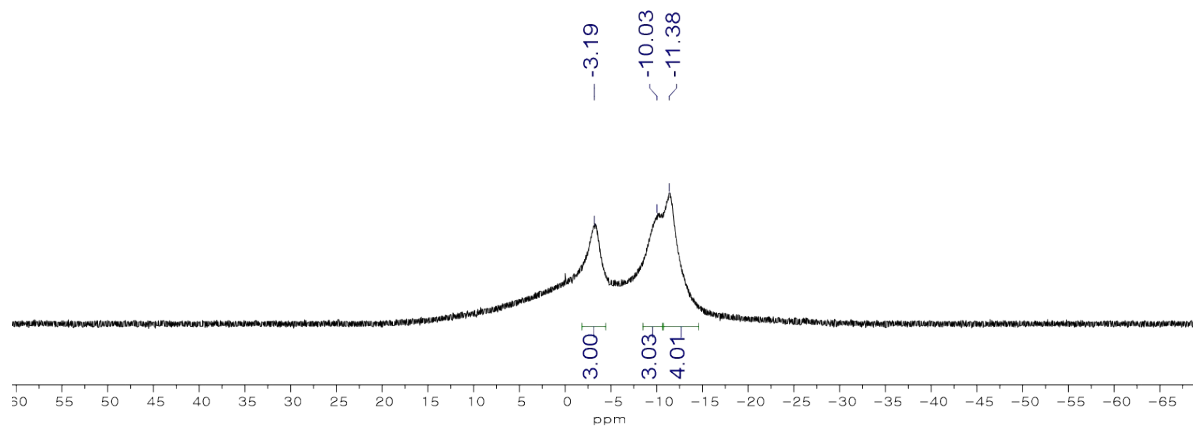

**Fig. S7**  $^{11}\text{B}\{^1\text{H}\}$  NMR spectra of *p*-SAC.

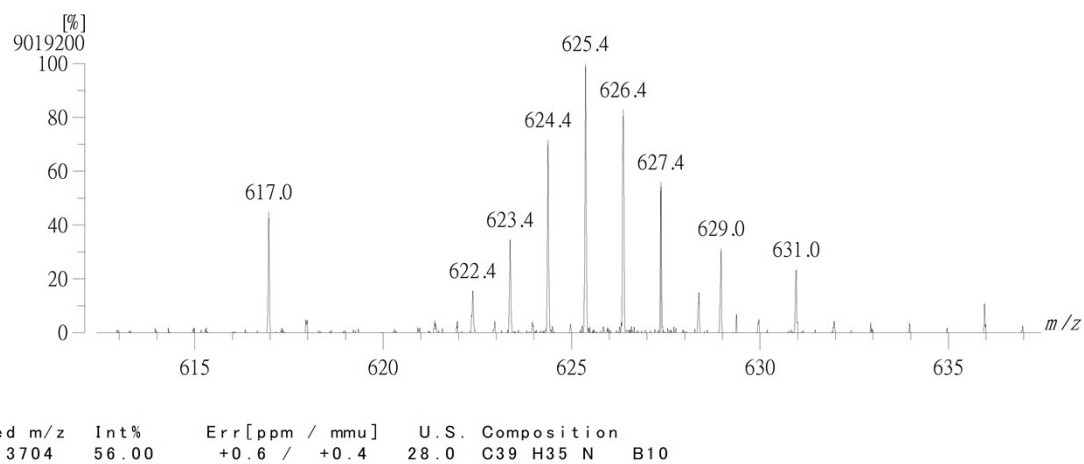

**Fig. S8** HR-mass spectrum for *p*-SAC (Calcd. for  $\text{C}_{39}\text{H}_{35}\text{B}_{10}\text{N}$ : 627.3700. Found: 627.3704).

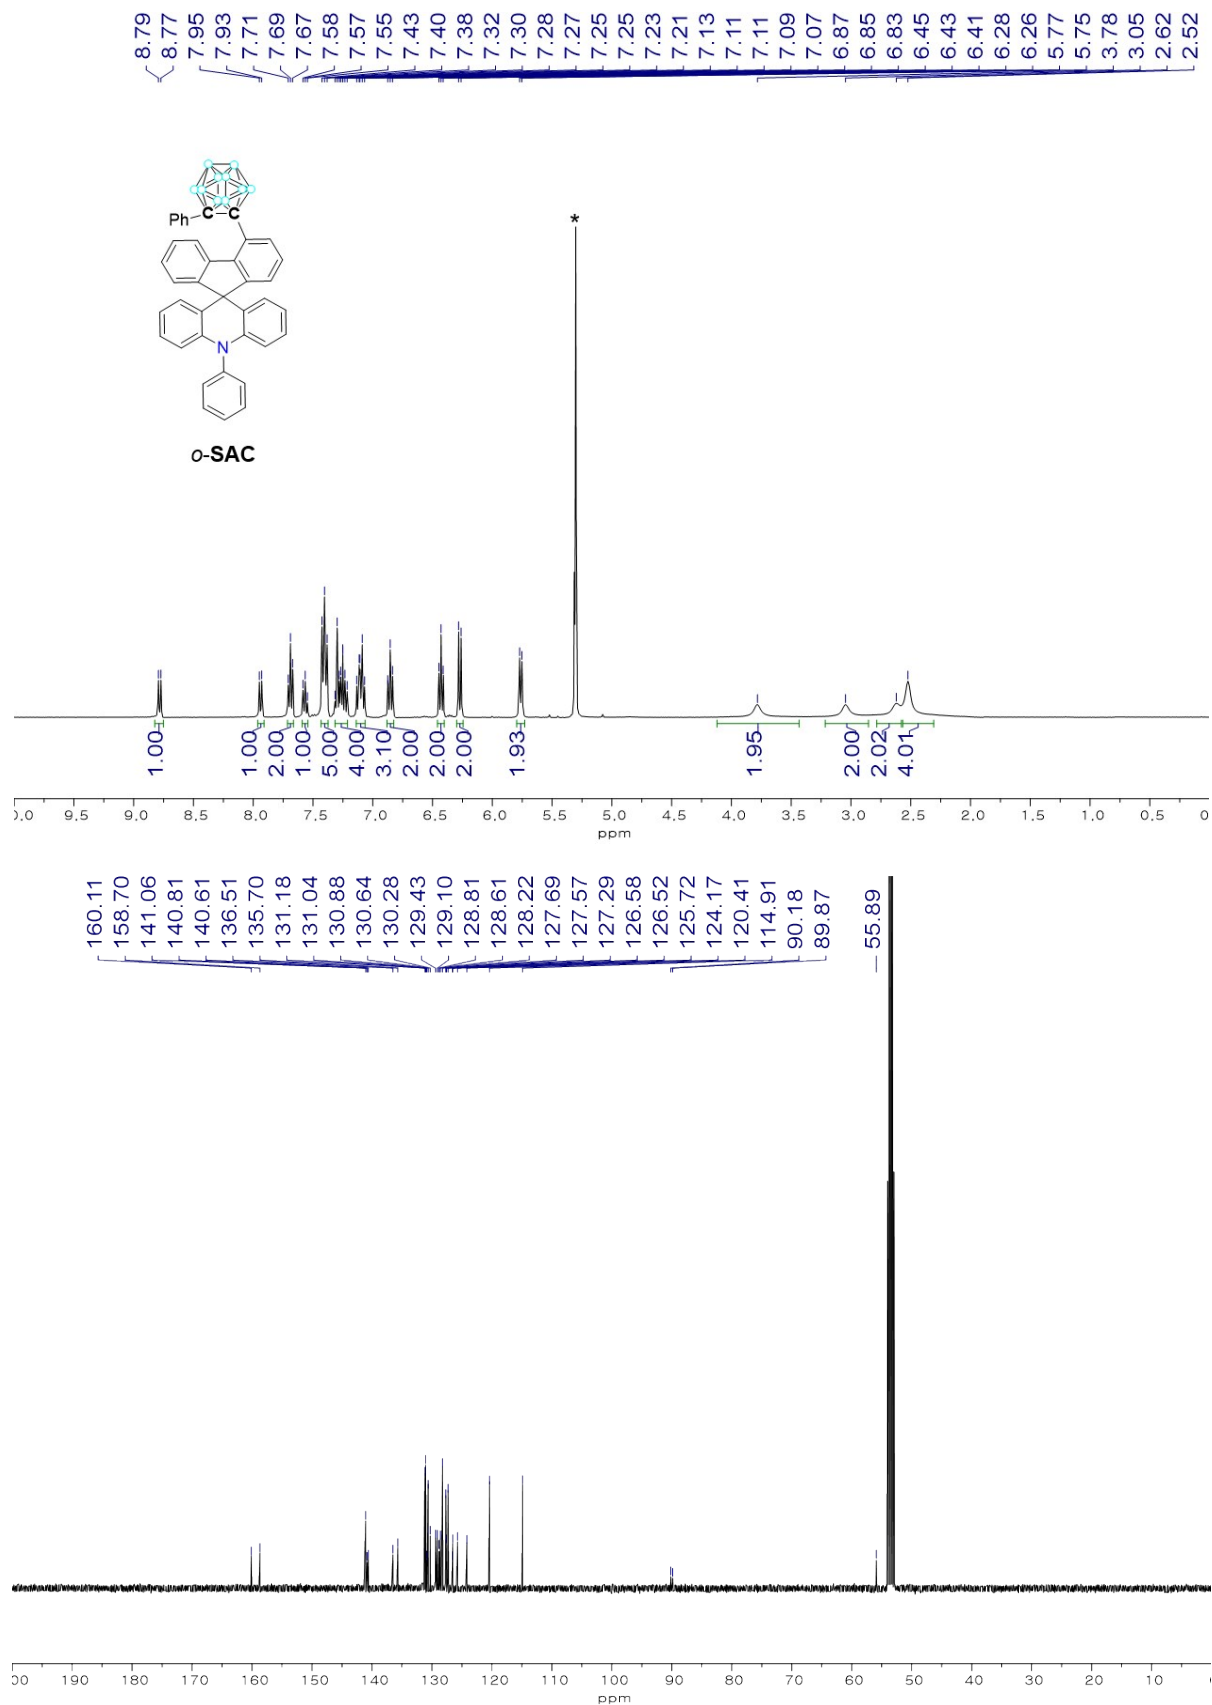

**Fig. S9** <sup>1</sup>H{<sup>11</sup>B} (top) and <sup>13</sup>C (bottom) NMR spectra of *o*-SAC (\* from residual CH<sub>2</sub>Cl<sub>2</sub> in CD<sub>2</sub>Cl<sub>2</sub>).

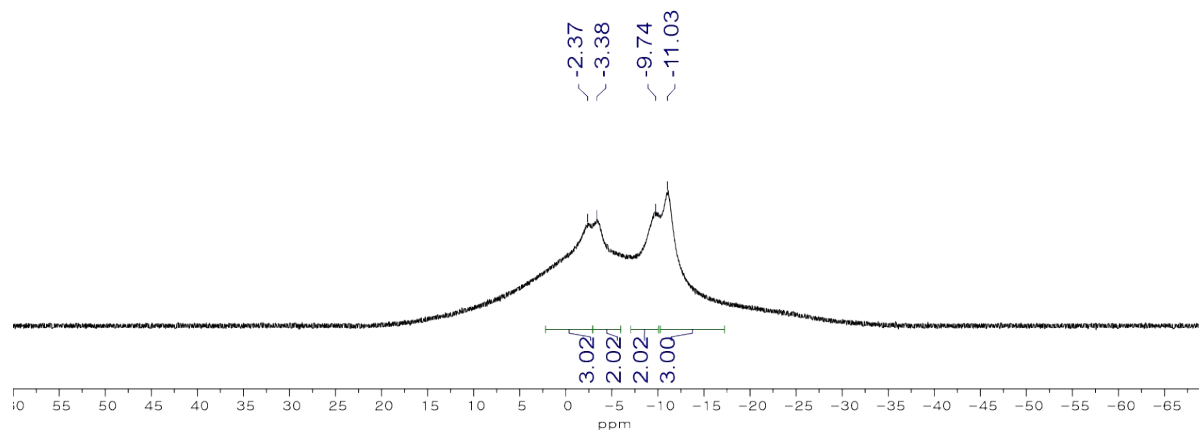

**Fig. S10**  $^{11}\text{B}\{^1\text{H}\}$  NMR spectra of *o*-SAC.

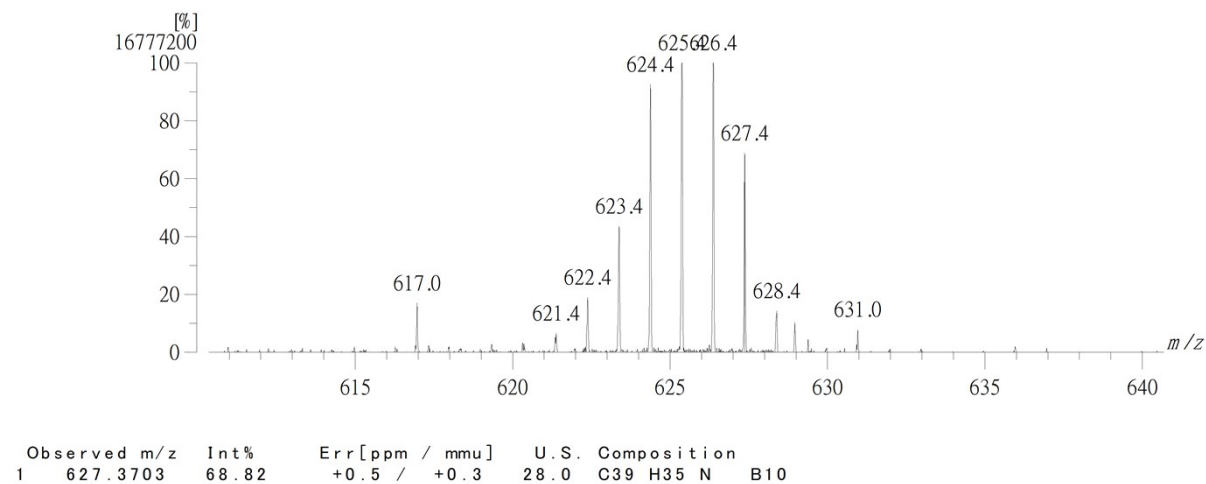

**Fig. S11** HR-mass spectrum for *o*-SAC (Calcd. for  $\text{C}_{39}\text{H}_{35}\text{B}_{10}\text{N}$ : 627.3700. Found: 627.3703).

**Table S1** Crystallographic data and parameters for *o*-SAC.

| Compound                                                               | 2( <i>o</i> -SAC·CH <sub>2</sub> Cl <sub>2</sub> )                                   |
|------------------------------------------------------------------------|--------------------------------------------------------------------------------------|
| Formula                                                                | 2(C <sub>39</sub> H <sub>35</sub> B <sub>10</sub> ·CH <sub>2</sub> Cl <sub>2</sub> ) |
| Formula weight                                                         | 1421.41                                                                              |
| Crystal system                                                         | Triclinic                                                                            |
| Space group                                                            | P <sub>-1</sub>                                                                      |
| <i>a</i> (Å)                                                           | 13.970(3)                                                                            |
| <i>b</i> (Å)                                                           | 15.150(3)                                                                            |
| <i>c</i> (Å)                                                           | 19.772(4)                                                                            |
| $\alpha$ (°)                                                           | 101.81(3)                                                                            |
| $\beta$ (°)                                                            | 108.00(3)                                                                            |
| $\gamma$ (°)                                                           | 100.13(3)                                                                            |
| <i>V</i> (Å <sup>3</sup> )                                             | 3764.9(15)                                                                           |
| <i>Z</i>                                                               | 2                                                                                    |
| $\rho_{\text{calc}}$ (g cm <sup>-3</sup> )                             | 1.254                                                                                |
| $\mu$ (mm <sup>-1</sup> )                                              | 0.204                                                                                |
| <i>F</i> (000)                                                         | 1472                                                                                 |
| <i>T</i> (K)                                                           | 153(2)                                                                               |
| Scan mode                                                              | <i>multi-scan</i>                                                                    |
| <i>hkl</i> range                                                       | -17 < <i>h</i> < 18,<br>-19 < <i>k</i> < 19,<br>-25 < <i>l</i> < 25                  |
| Measd reflns                                                           | 38062                                                                                |
| Unique reflns [ <i>R</i> <sub>int</sub> ]                              | 17206 [0.1496]                                                                       |
| Reflns used for refinement                                             | 17206                                                                                |
| Refined parameters                                                     | 955                                                                                  |
| <i>R</i> <sub>1</sub> <sup><i>a</i></sup> ( <i>I</i> > 2σ( <i>I</i> )) | 0.0868                                                                               |
| <i>wR</i> <sub>2</sub> <sup><i>b</i></sup> all data                    | 0.1837                                                                               |
| GOF on <i>F</i> <sup>2</sup>                                           | 1.005                                                                                |
| $\rho_{\text{fin}}$ (max/min) (e Å <sup>-3</sup> )                     | 0.357, -0.502                                                                        |

$${}^a R_1 = \sum ||F_o| - |F_c|| / \sum |F_o|. \quad {}^b wR_2 = \{ [\sum w(F_o^2 - F_c^2)^2] / [\sum w(F_o^2)^2] \}^{1/2}.$$

**Table S2** Selected bond lengths (Å) and angles (°) for *o*-SAC

| bond lengths (Å) |           |
|------------------|-----------|
| C1–C2            | 1.754(11) |
| C1–C3            | 1.506(10) |
| C2–C34           | 1.507(10) |
| angles (°)       |           |
| C2–C1–C3         | 119.1(6)  |
| C1–C2–C34        | 117.3(7)  |
| C7–C15–C14       | 100.8(6)  |
| C7–C15–C16       | 110.3(6)  |
| C7–C15–C22       | 108.6(7)  |
| C14–C15–C16      | 110.4(7)  |
| C14–C15–C22      | 113.0(6)  |
| C16–C15–C22      | 113.1(7)  |
| C17–N–C27        | 120.8(7)  |
| C17–N–C28        | 120.0(7)  |
| C27–N–C28        | 119.1(7)  |

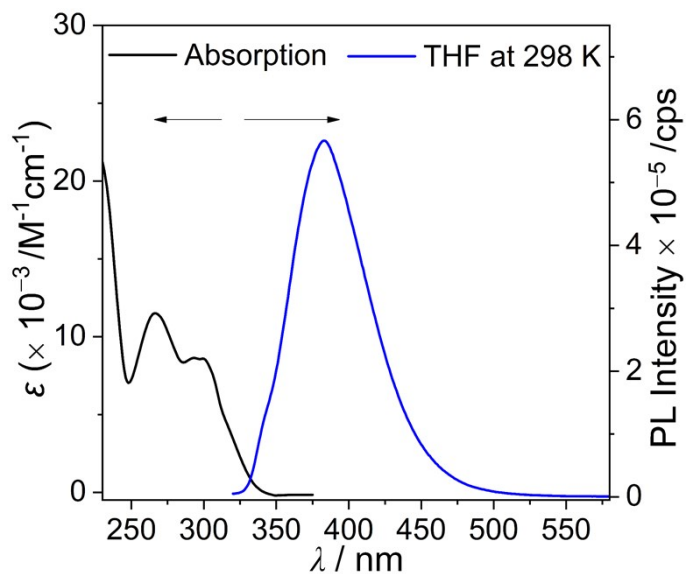

**Fig. S12** UV-vis absorption and PL spectra ( $\lambda_{\text{ex}} = 310$  nm) for **SA** in THF ( $5.0 \times 10^{-5}$  M).  $\lambda_{\text{abs}} = 268$  nm ( $\epsilon = 11,500 \text{ M}^{-1} \text{ cm}^{-1}$ ), 297 nm ( $8,600 \text{ M}^{-1} \text{ cm}^{-1}$ ).  $\lambda_{\text{em}} = 387$  nm.

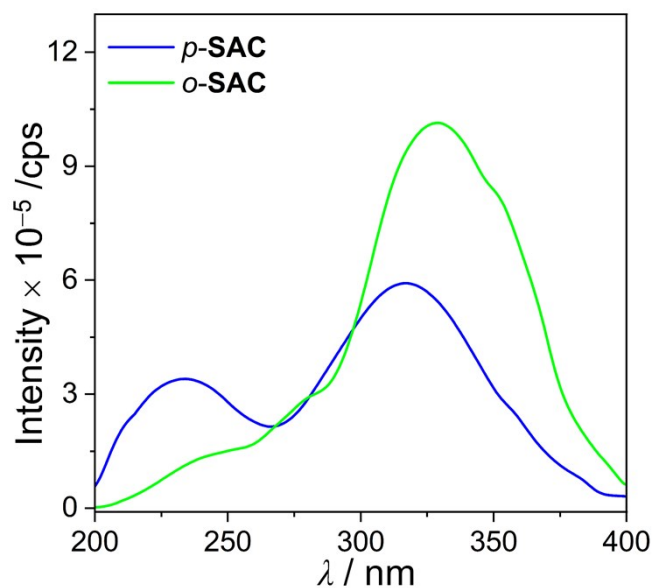

**Fig. S13** Excitation graphs in THF ( $5.0 \times 10^{-5}$  M) of *p*-SAC and *o*-SAC.

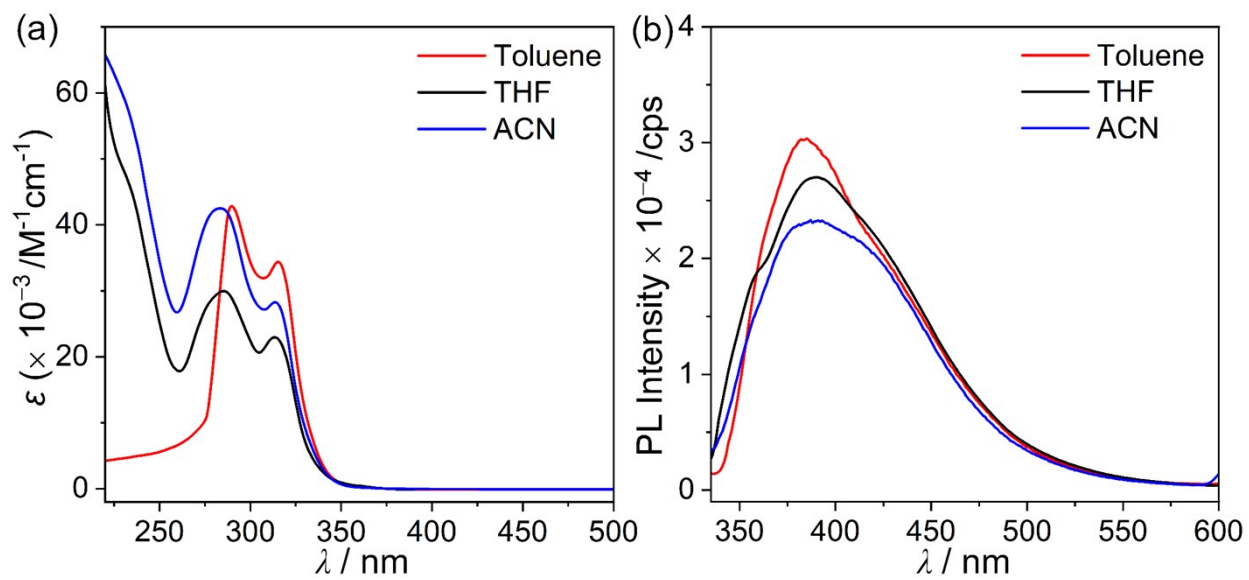

**Fig. S14** (a) UV-vis absorption and (b) PL spectra of *p*-SAC ( $5.0 \times 10^{-5}$  M,  $\lambda_{\text{ex}} = 313$  nm) in various organic solvents.



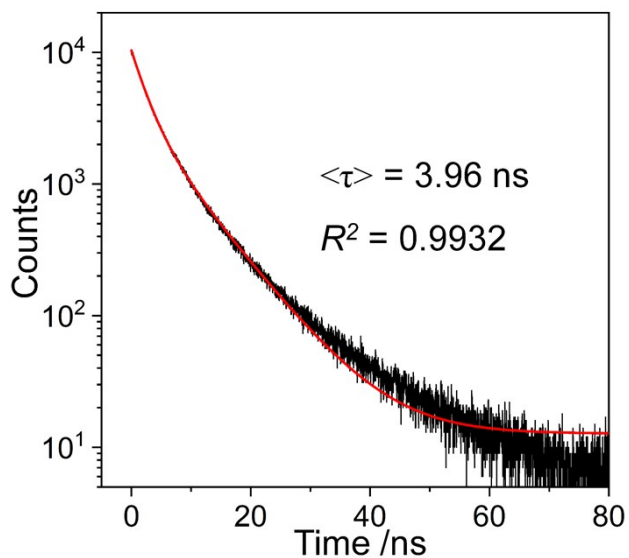

**Fig. S15** Emission decay curve for *p*-SAC in the film state (5 wt% doped in PMMA) detected at 428 nm at 298 K. The red-line is its single exponential fitting curve.

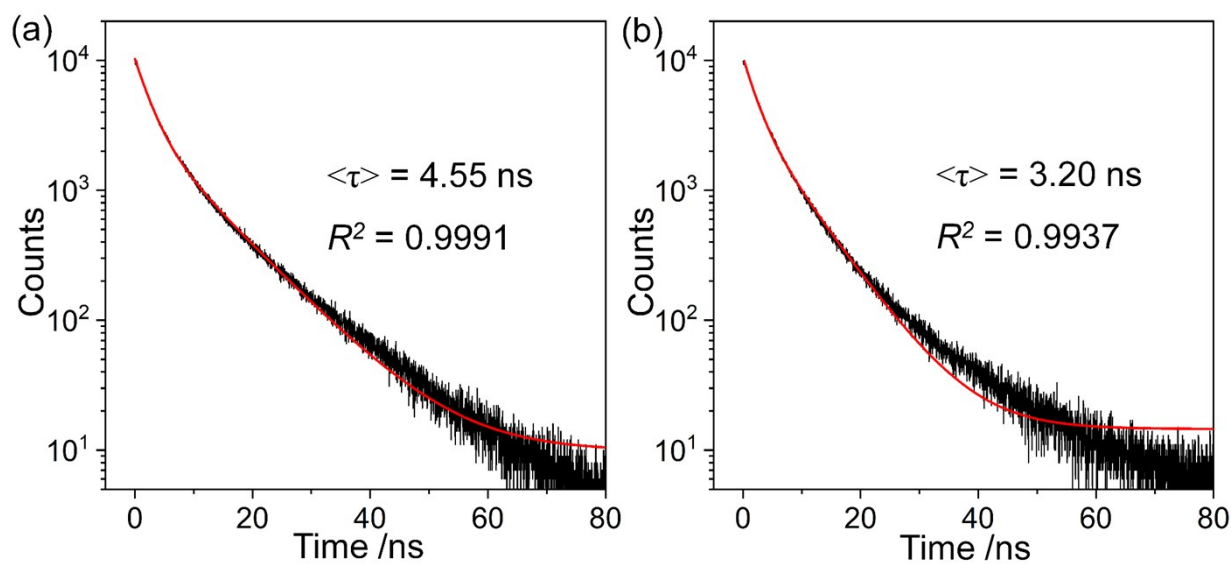

**Fig. S16** Emission decay curves for *o*-SAC in (a) THF ( $5.0 \times 10^{-5}$  M) detected at 461nm and (b) the film state (5 wt% doped in PMMA) detected at 440 nm at 298 K. Each red-line is its single exponential fitting curve.

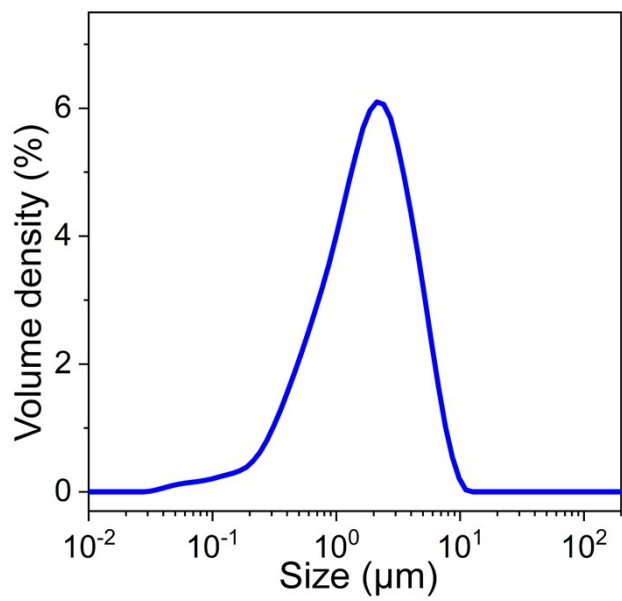

**Fig. S17** Dynamic light scattering (DLS) data for *o*-SAC in acetonitrile ( $7.0 \times 10^{-4}$  M) at 20 °C.

### Theoretical calculation details

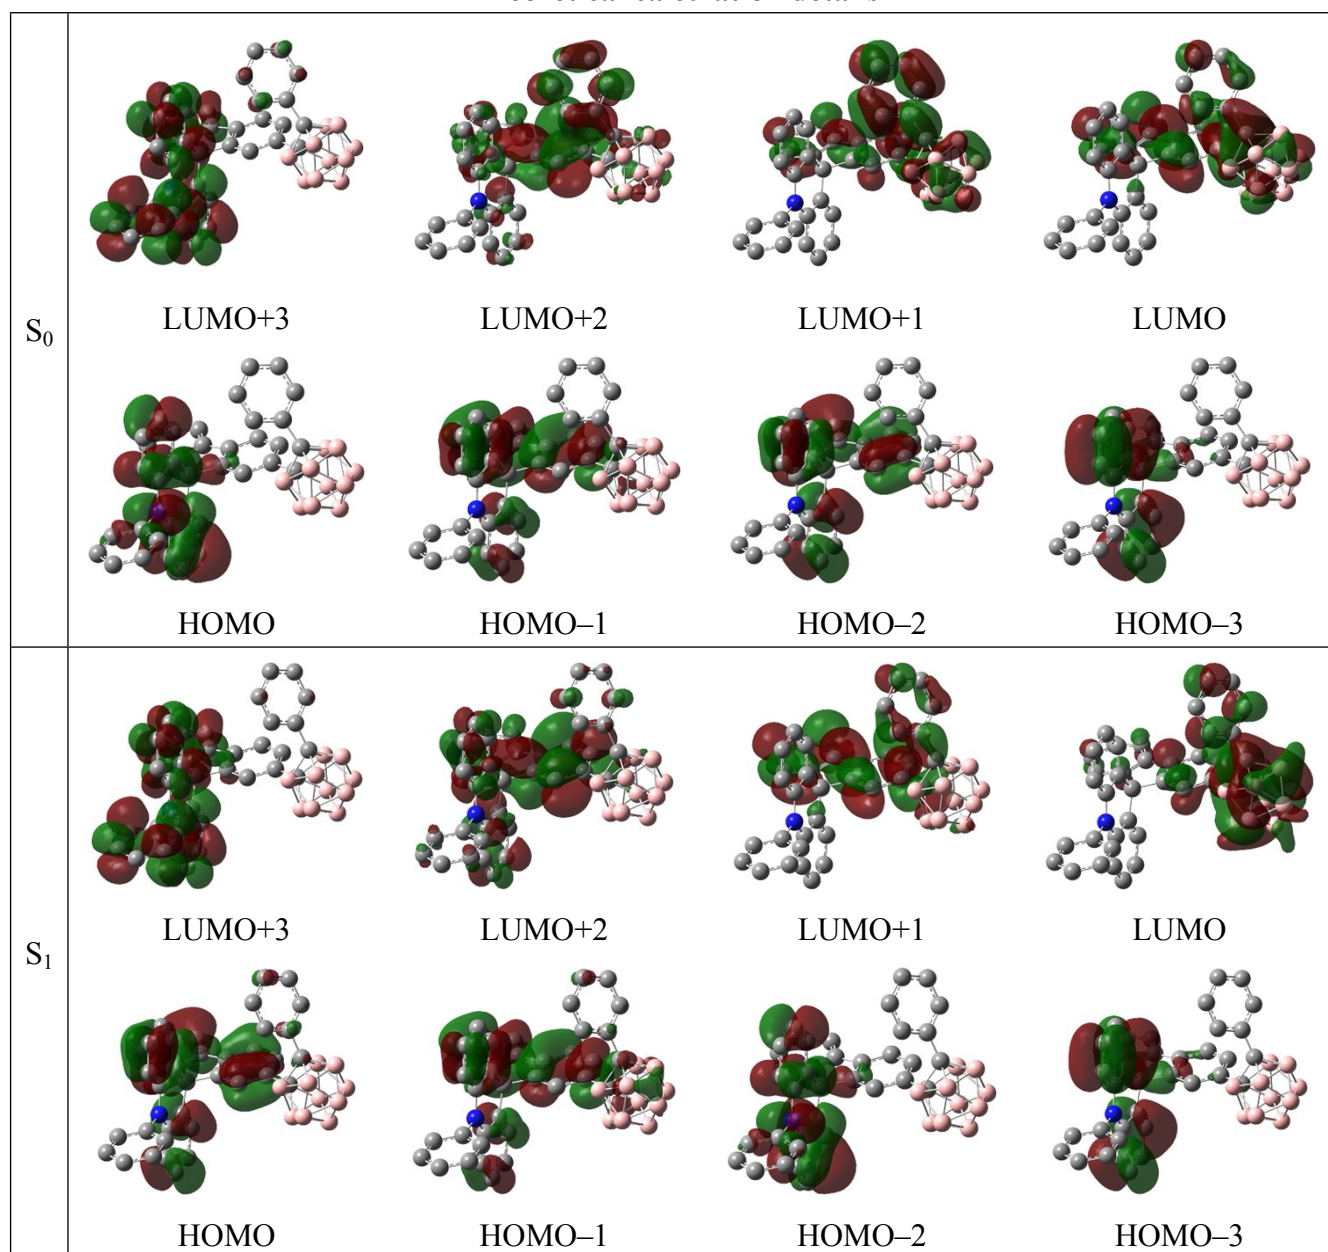

**Fig. S18** The selected frontier orbitals of *p*-SAC from B3LYP calculations (Isovalue = 0.04 a.u.) at the ground state (S<sub>0</sub>) and first singlet excited state (S<sub>1</sub>) optimized geometries in THF.

**Table S3** Computed absorption wavelengths ( $\lambda_{\text{calc}}$  in nm) and oscillator strengths ( $f_{\text{calc}}$ ) for *p*-SAC from TD-B3LYP calculations using the B3LYP geometries at the ground state ( $S_0$ ) and first singlet excited state ( $S_1$ ) optimized geometries in THF

| state | $\lambda_{\text{calc}}$ (/nm) | $f_{\text{calc}}$ | Major contribution                            |
|-------|-------------------------------|-------------------|-----------------------------------------------|
| $S_0$ |                               |                   |                                               |
| 1     | 336.44                        | 0.0639            | HOMO → LUMO (98.6%)                           |
| 2     | 326.58                        | 0.0079            | HOMO → LUMO+1 (93.8%)<br>HOMO → LUMO+2 (4.9%) |
| 3     | 316.03                        | 0.0001            | HOMO → LUMO+1 (4.8%)<br>HOMO → LUMO+2 (90.8%) |
| 4     | 305.21                        | 0.3799            | HOMO-1 → LUMO (94.9%)                         |
| 5     | 302.42                        | 0.0236            | HOMO → LUMO+3 (91.9%)                         |
| $S_1$ |                               |                   |                                               |
| 1     | 475.68                        | 0.3534            | HOMO → LUMO (99.9%)                           |
| 2     | 453.45                        | 0.0827            | HOMO-1 → LUMO (99.0%)                         |
| 3     | 443.48                        | 0.0031            | HOMO-3 → LUMO (4.5%)<br>HOMO-2 → LUMO (93.6%) |
| 4     | 400.05                        | 0.0010            | HOMO-3 → LUMO (97.3%)                         |
| 5     | 392.94                        | 0.2903            | HOMO-1 → LUMO+1 (99.3%)                       |

**Table S4** Molecular orbital energies (in eV) and molecular orbital distributions (in %) of *p*-SAC at the ground state ( $S_0$ ) and first singlet excited state ( $S_1$ ) optimized geometries in THF

|        | E (eV) | Carborane | Car-phenyl | Car-fluorene | tripheylamine |
|--------|--------|-----------|------------|--------------|---------------|
| $S_0$  |        |           |            |              |               |
| LUMO+3 | -0.54  | 0.2       | 2.7        | 16.6         | 80.5          |
| LUMO+2 | -0.79  | 8.5       | 19.0       | 62.2         | 10.3          |
| LUMO+1 | -1.04  | 20.9      | 51.8       | 26.8         | 0.5           |
| LUMO   | -1.60  | 27.4      | 8.7        | 63.3         | 0.6           |
| HOMO   | -5.08  | 0.0       | 0.1        | 3.5          | 96.4          |
| HOMO-1 | -5.55  | 2.7       | 0.1        | 78.2         | 19.0          |
| HOMO-2 | -6.60  | 1.3       | 0.3        | 57.8         | 40.5          |
| HOMO-3 | -6.65  | 0.1       | 0.2        | 7.5          | 92.2          |
| $S_1$  |        |           |            |              |               |
| LUMO+3 | -0.54  | 0.3       | 1.2        | 27.3         | 71.2          |
| LUMO+2 | -0.76  | 4.5       | 3.4        | 68.0         | 24.1          |
| LUMO+1 | -1.19  | 6.2       | 8.1        | 84.7         | 1.0           |
| LUMO   | -3.45  | 72.8      | 11.8       | 15.3         | 0.1           |
| HOMO   | -6.07  | 2.5       | 2.3        | 62.7         | 32.5          |
| HOMO-1 | -6.30  | 5.7       | 1.9        | 74.0         | 18.4          |
| HOMO-2 | -6.63  | 0.0       | 0.0        | 3.7          | 96.3          |
| HOMO-3 | -6.69  | 0.1       | 0.0        | 6.6          | 93.3          |

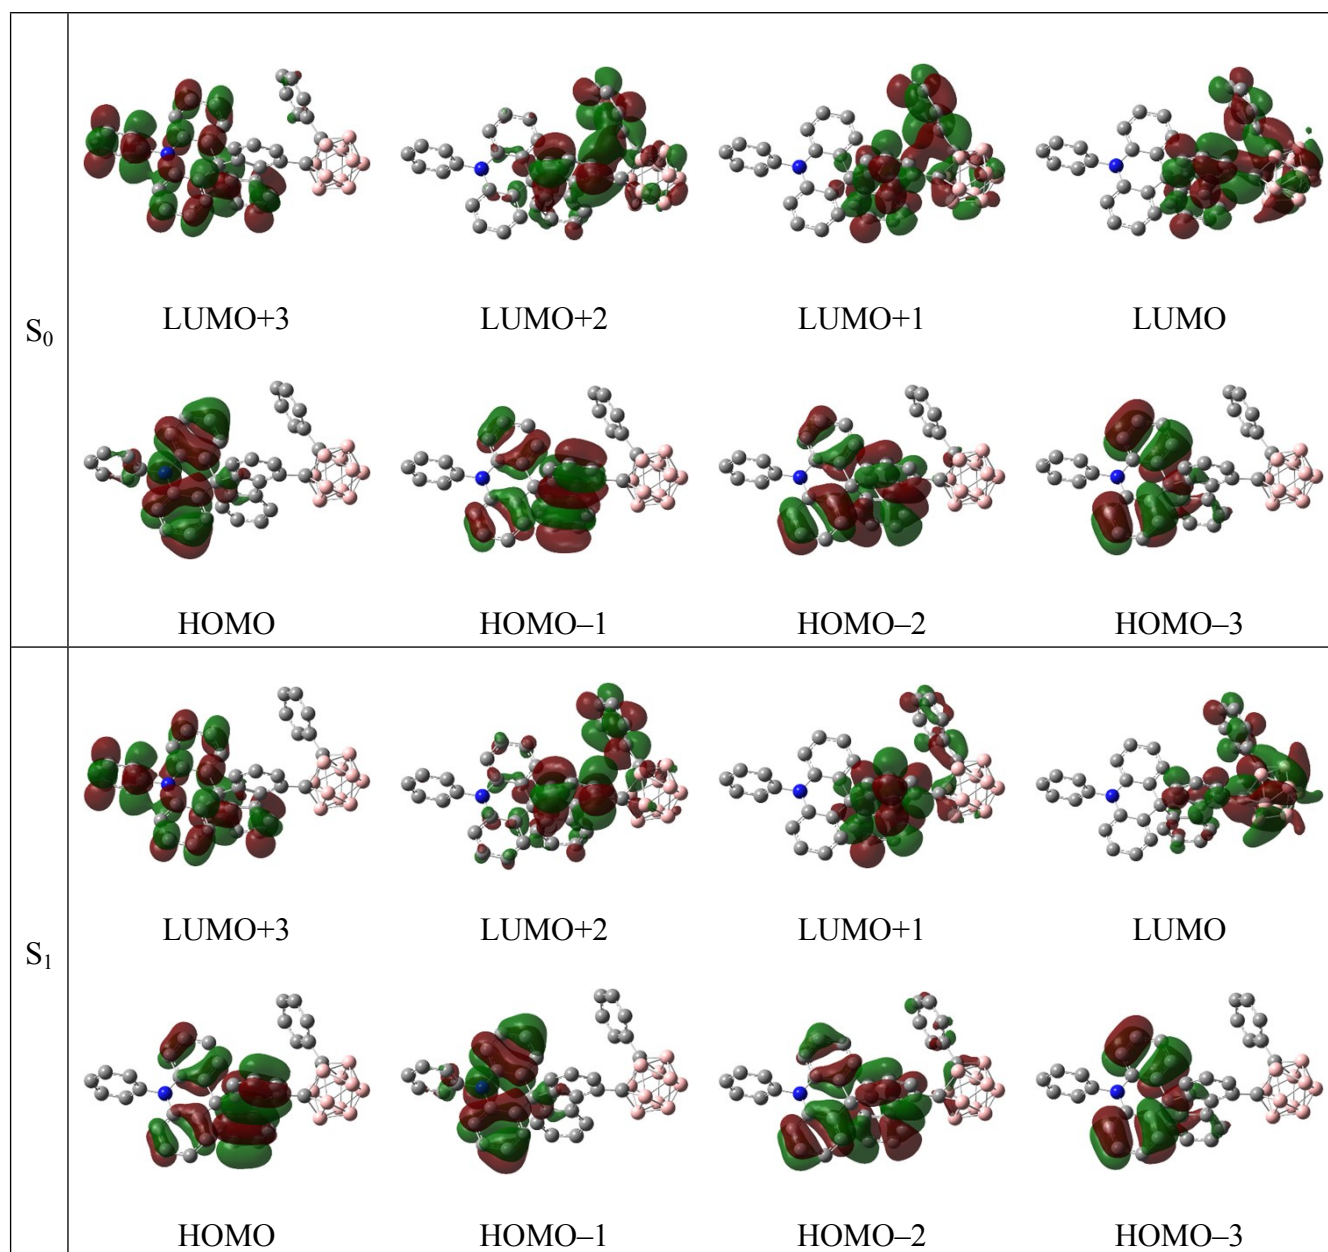

**Fig. S19** The selected frontier orbitals of *o*-SAC from B3LYP calculations (Isovalue = 0.04 a.u.) at the ground state (S<sub>0</sub>) and first singlet excited state (S<sub>1</sub>) optimized geometries in THF.

**Table S5** Computed absorption wavelengths ( $\lambda_{\text{calc}}$  in nm) and oscillator strengths ( $f_{\text{calc}}$ ) for *o*-SAC from TD-B3LYP calculations using the B3LYP geometries at the ground state ( $S_0$ ) and first singlet excited state ( $S_1$ ) optimized geometries in THF

| state | $\lambda_{\text{calc}}$ (/nm) | $f_{\text{calc}}$ | Major contribution                                                    |
|-------|-------------------------------|-------------------|-----------------------------------------------------------------------|
| $S_0$ |                               |                   |                                                                       |
| 1     | 338.66                        | 0.1227            | HOMO $\rightarrow$ LUMO (98.3%)                                       |
| 2     | 305.83                        | 0.0065            | HOMO $\rightarrow$ LUMO+1 (91.6%)<br>HOMO $\rightarrow$ LUMO+2 (5.7%) |
| 3     | 298.70                        | 0.0895            | HOMO-1 $\rightarrow$ LUMO (97.1%)                                     |
| 4     | 284.54                        | 0.0756            | HOMO $\rightarrow$ LUMO+1 (6.0%)<br>HOMO $\rightarrow$ LUMO+2 (91.0%) |
| 5     | 279.99                        | 0.0149            | HOMO $\rightarrow$ LUMO+3 (92.6%)<br>HOMO $\rightarrow$ LUMO+5 (4.8%) |
| $S_1$ |                               |                   |                                                                       |
| 1     | 482.81                        | 0.1605            | HOMO $\rightarrow$ LUMO (99.9%)                                       |
| 2     | 465.10                        | 0.0746            | HOMO-1 $\rightarrow$ LUMO (99.3%)                                     |
| 3     | 421.88                        | 0.0017            | HOMO-2 $\rightarrow$ LUMO (95.7%)                                     |
| 4     | 407.80                        | 0.0291            | HOMO-3 $\rightarrow$ LUMO (97.1%)                                     |
| 5     | 394.27                        | 0.2143            | HOMO $\rightarrow$ LUMO+1 (94.6%)                                     |

**Table S6** Molecular orbital energies (in eV) and molecular orbital distributions (in %) of *o*-SAC at the ground state ( $S_0$ ) and first singlet excited state ( $S_1$ ) optimized geometries in THF

|        | E (eV) | Carborane | Car-phenyl | Car-fluorene | tripheylamine |
|--------|--------|-----------|------------|--------------|---------------|
| $S_0$  |        |           |            |              |               |
| LUMO+3 | -0.56  | 0.9       | 1.6        | 21.1         | 76.4          |
| LUMO+2 | -0.82  | 10.9      | 26.1       | 56.0         | 7.0           |
| LUMO+1 | -1.16  | 16.3      | 32.2       | 50.1         | 1.4           |
| LUMO   | -1.83  | 29.3      | 7.7        | 63.6         | 0.5           |
| HOMO   | -5.18  | 0.0       | 0.0        | 3.4          | 96.5          |
| HOMO-1 | -5.68  | 0.5       | 0.1        | 77.4         | 22.0          |
| HOMO-2 | -6.57  | 2.1       | 0.2        | 65.3         | 32.4          |
| HOMO-3 | -6.66  | 0.1       | 0.1        | 7.7          | 92.2          |
| $S_1$  |        |           |            |              |               |
| LUMO+3 | -0.58  | 0.4       | 0.7        | 22.5         | 76.4          |
| LUMO+2 | -0.73  | 6.3       | 18.5       | 63.5         | 11.7          |
| LUMO+1 | -1.24  | 5.7       | 5.7        | 87.2         | 1.3           |
| LUMO   | -3.55  | 73.4      | 11.1       | 15.4         | 0.1           |
| HOMO   | -5.98  | 0.9       | 0.3        | 77.2         | 21.7          |
| HOMO-1 | -6.29  | 0.0       | 0.0        | 3.8          | 96.2          |
| HOMO-2 | -6.60  | 3.8       | 2.8        | 61.6         | 31.7          |
| HOMO-3 | -6.70  | 0.1       | 0.0        | 8.0          | 91.9          |



**Table S7** Cartesian coordinates of the ground state ( $S_0$ ) fully optimized geometry in THF of *p*-SAC from B3LYP calculations (in Å)

| Atom | X        | Y         | Z         |   |           |           |           |   |           |           |           |
|------|----------|-----------|-----------|---|-----------|-----------|-----------|---|-----------|-----------|-----------|
| C    | 4.061657 | -1.023781 | 0.224913  | C | 2.547262  | -0.157151 | 3.621967  | H | -1.673394 | 2.049749  | -2.875068 |
| C    | 3.173202 | -0.405422 | -1.174200 | H | 2.000101  | -1.451743 | 2.007881  | C | -2.739120 | -0.982472 | 2.540863  |
| B    | 5.616568 | -1.515836 | -0.274505 | C | 3.474983  | 0.760374  | 4.115227  | C | -1.417318 | 0.795094  | 3.506354  |
| B    | 4.329956 | -2.697912 | 0.025894  | H | 5.321082  | 1.803130  | 3.717247  | H | -0.674154 | 2.240880  | 2.109362  |
| B    | 5.704389 | -1.214361 | -2.021439 | H | 1.676507  | -0.427444 | 4.210524  | C | -2.180731 | 5.658055  | -0.318126 |
| B    | 5.368277 | -2.858708 | -1.409291 | H | 3.334610  | 1.207403  | 5.094531  | H | -0.064195 | 5.705388  | -0.745014 |
| B    | 4.475435 | -2.239339 | -2.813455 | C | 2.184281  | 0.714145  | -0.988016 | H | -4.265511 | 5.321973  | 0.113357  |
| B    | 3.610199 | -3.137719 | -1.536580 | C | 0.832416  | 0.433065  | -0.717155 | C | -3.608254 | -0.648166 | -3.524583 |
| B    | 4.167937 | -0.507201 | -2.557468 | C | 2.586896  | 2.053933  | -1.136348 | H | -4.272211 | -2.066218 | -2.066277 |
| B    | 2.879106 | -1.689201 | -2.257199 | C | -0.069878 | 1.475472  | -0.577594 | H | -2.798297 | 0.927667  | -4.768130 |
| B    | 2.807198 | -1.953255 | -0.501500 | H | 0.490819  | -0.590797 | -0.625121 | C | -2.167071 | -0.374730 | 3.650839  |
| B    | 4.853894 | -0.071931 | -0.977072 | C | 1.678716  | 3.102272  | -1.000262 | H | -3.319031 | -1.887205 | 2.669020  |
| H    | 6.501696 | -1.365676 | 0.494866  | H | 3.618692  | 2.284201  | -1.369625 | H | -0.969313 | 1.280467  | 4.367347  |
| H    | 4.318174 | -3.359773 | 1.006085  | C | -1.577666 | 1.388578  | -0.272866 | H | -2.286726 | 6.738479  | -0.339403 |
| H    | 6.161120 | -3.738952 | -1.483292 | C | 0.343662  | 2.812770  | -0.712926 | H | -4.112119 | -1.161331 | -4.338366 |
| H    | 6.728708 | -0.904708 | -2.533772 | H | 2.017335  | 4.126615  | -1.121094 | H | -2.312016 | -0.818675 | 4.631383  |
| H    | 5.188909 | 1.019706  | -0.695002 | C | -1.944677 | 2.883343  | -0.256677 | N | -3.168977 | -1.067434 | 0.140961  |
| H    | 1.793098 | -2.107667 | 0.071716  | C | -2.319386 | 0.646546  | -1.390377 | C | -3.928322 | -2.273906 | 0.339326  |
| H    | 3.125772 | -4.207936 | -1.702314 | C | -1.820648 | 0.741715  | 1.095704  | C | -3.294532 | -3.517411 | 0.256264  |
| H    | 4.615497 | -2.670389 | -3.910489 | C | -0.818478 | 3.687877  | -0.514114 | C | -5.297617 | -2.201258 | 0.614114  |
| H    | 4.042173 | 0.344176  | -3.368649 | C | -3.188084 | 3.462135  | -0.029763 | C | -4.031543 | -4.687309 | 0.448268  |
| H    | 1.862445 | -1.655632 | -2.860248 | C | -2.245600 | 1.143784  | -2.698625 | H | -2.231326 | -3.559347 | 0.041716  |
| C    | 3.834794 | -0.393364 | 1.574840  | C | -2.578077 | -0.437126 | 1.248641  | C | -6.031023 | -3.373374 | 0.805508  |
| C    | 4.765907 | 0.526870  | 2.083139  | C | -1.256076 | 1.332584  | 2.234004  | H | -5.777136 | -1.229384 | 0.675622  |
| C    | 2.726702 | -0.733753 | 2.365071  | C | -0.930255 | 5.080703  | -0.546523 | C | -5.399249 | -4.616525 | 0.722820  |
| C    | 4.587631 | 1.096114  | 3.342552  | C | -3.300281 | 4.856311  | -0.061887 | H | -3.537405 | -5.651782 | 0.382962  |
| H    | 5.638460 | 0.795689  | 1.500225  | H | -4.059365 | 2.844661  | 0.168884  | H | -7.093984 | -3.314822 | 1.018521  |
|      |          |           |           | C | -3.700459 | -1.163588 | -2.238415 | H | -5.971192 | -5.527291 | 0.871692  |
|      |          |           |           | C | -2.876621 | 0.516700  | -3.766865 | C | -3.060438 | -0.528114 | -1.152547 |

**Table S8** Cartesian coordinates of the first excited state ( $S_1$ ) fully optimized geometry in THF of  $p$ -SAC from B3LYP calculations (in Å)

| Atom | X        | Y         | Z         | C | 3.664712  | -1.053906 | 3.744583  | H | -2.488872 | 2.369051  | -2.477599 |
|------|----------|-----------|-----------|---|-----------|-----------|-----------|---|-----------|-----------|-----------|
| C    | 4.371215 | -0.795613 | 0.023861  | H | 3.028047  | -2.114985 | 1.989157  | C | -2.401489 | -1.496812 | 2.507651  |
| C    | 2.845087 | 0.206576  | -1.525066 | C | 4.445665  | -0.016045 | 4.259564  | C | -1.363416 | 0.376423  | 3.611846  |
| B    | 5.702124 | -0.929548 | -0.914246 | H | 5.817450  | 1.574549  | 3.767681  | H | -1.016369 | 2.119141  | 2.408076  |
| B    | 4.548065 | -2.275893 | -0.645280 | H | 3.075773  | -1.675246 | 4.413748  | C | -2.951393 | 5.533772  | 0.493746  |
| B    | 5.415506 | -0.294894 | -2.535577 | H | 4.467362  | 0.178227  | 5.327741  | H | -0.901983 | 5.859536  | -0.106299 |
| B    | 5.323854 | -2.063860 | -2.229490 | C | 1.797378  | 1.175318  | -1.156047 | H | -4.942316 | 4.932648  | 1.062246  |
| B    | 4.201589 | -1.328216 | -3.366440 | C | 0.507110  | 0.734240  | -0.790866 | C | -3.963388 | -0.577560 | -3.323574 |
| B    | 3.570765 | -2.442863 | -2.104786 | C | 2.047593  | 2.565815  | -1.162602 | H | -4.165934 | -2.271274 | -2.036644 |
| B    | 3.794396 | 0.322568  | -2.849357 | C | -0.463693 | 1.660603  | -0.452484 | H | -3.615263 | 1.276152  | -4.380068 |
| B    | 2.638460 | -1.024010 | -2.579606 | H | 0.291152  | -0.328451 | -0.781080 | C | -1.861736 | -0.934610 | 3.646647  |
| B    | 2.943834 | -1.347841 | -0.773950 | C | 1.066629  | 3.493567  | -0.821542 | H | -2.787284 | -2.505814 | 2.532838  |
| B    | 4.508623 | 0.476250  | -1.139389 | H | 3.033527  | 2.918031  | -1.444447 | H | -0.937883 | 0.822011  | 4.503984  |
| H    | 6.757058 | -0.805656 | -0.379713 | C | -1.927086 | 1.386295  | -0.026120 | H | -3.161493 | 6.592645  | 0.611265  |
| H    | 4.711683 | -3.190691 | 0.096847  | C | -0.205947 | 3.042301  | -0.459553 | H | -4.455600 | -1.064088 | -4.157795 |
| H    | 6.144427 | -2.843314 | -2.604431 | H | 1.295553  | 4.555183  | -0.840646 | H | -1.825796 | -1.510542 | 4.564207  |
| H    | 6.330263 | 0.200313  | -3.117336 | C | -2.440093 | 2.821869  | 0.201391  | N | -3.013722 | -1.324059 | 0.163360  |
| H    | 4.813482 | 1.554461  | -0.745709 | C | -2.674954 | 0.697393  | -1.156335 | C | -3.481379 | -2.700127 | 0.233804  |
| H    | 2.030321 | -1.689982 | -0.095356 | C | -1.946640 | 0.573858  | 1.258844  | C | -2.597656 | -3.730493 | -0.086497 |
| H    | 3.134136 | -3.519793 | -2.371188 | C | -1.420969 | 3.759356  | -0.057317 | C | -4.798004 | -2.954467 | 0.618532  |
| H    | 4.246383 | -1.599285 | -4.526704 | C | -3.706279 | 3.227287  | 0.602486  | C | -3.049678 | -5.048986 | -0.018038 |
| H    | 3.613530 | 1.255444  | -3.564701 | C | -2.856753 | 1.355042  | -2.372167 | H | -1.579408 | -3.502288 | -0.382528 |
| H    | 1.567098 | -1.127418 | -3.086583 | C | -2.454619 | -0.749974 | 1.302207  | C | -5.235981 | -4.277797 | 0.682620  |
| C    | 4.390703 | -0.522708 | 1.475761  | C | -1.409902 | 1.109537  | 2.428377  | H | -5.462224 | -2.131977 | 0.861745  |
| C    | 5.174276 | 0.518497  | 2.011860  | C | -1.677505 | 5.125160  | 0.089590  | C | -4.364491 | -5.322048 | 0.365226  |
| C    | 3.635991 | -1.303235 | 2.373923  | C | -3.958669 | 4.597155  | 0.748784  | H | -2.371839 | -5.859084 | -0.264877 |
| C    | 5.201374 | 0.766625  | 3.382679  | H | -4.489742 | 2.501425  | 0.800838  | H | -6.257560 | -4.488879 | 0.980475  |
| H    | 5.768721 | 1.132643  | 1.344101  | C | -3.801390 | -1.258768 | -2.134039 | H | -4.710390 | -6.349236 | 0.416545  |
|      |          |           |           | C | -3.491107 | 0.737562  | -3.447262 | C | -3.159519 | -0.630019 | -1.036258 |

**Table S9** Cartesian coordinates of the ground state ( $S_0$ ) fully optimized geometry in THF of *o*-SAC from B3LYP calculations (in Å)

| Atom | X        | Y         | Z         |   |           |           |           |   |           |           |           |
|------|----------|-----------|-----------|---|-----------|-----------|-----------|---|-----------|-----------|-----------|
| C    | 4.567789 | -0.709686 | -0.084242 | C | 3.002616  | -4.049561 | -1.052741 | C | -1.459385 | -3.088989 | 1.074410  |
| C    | 3.714577 | 0.822252  | -0.632257 | H | 4.101915  | -2.531871 | -2.088625 | H | 0.048087  | -1.586778 | 0.839157  |
| B    | 5.708975 | -0.292547 | 1.102749  | C | 2.455586  | -4.466802 | 0.160907  | C | 0.886980  | 2.454168  | 3.258860  |
| B    | 6.201432 | -0.648925 | -0.559395 | H | 2.178430  | -3.975024 | 2.243490  | H | 2.533238  | 2.332447  | 1.919366  |
| B    | 5.628598 | 1.469609  | 1.295584  | H | 2.914694  | -4.674559 | -1.935736 | H | -0.922871 | 2.481407  | 4.434469  |
| B    | 6.914763 | 0.735976  | 0.298683  | H | 1.938299  | -5.418777 | 0.228800  | C | -4.307476 | 3.433274  | -1.301971 |
| B    | 6.107327 | 2.208922  | -0.261561 | C | -0.279972 | 0.150143  | -2.214558 | H | -5.750054 | 1.886018  | -0.980397 |
| B    | 6.422356 | 0.886396  | -1.412541 | C | 2.092531  | 0.406702  | -2.449827 | H | -2.641064 | 4.795739  | -1.533488 |
| B    | 4.398103 | 2.124247  | 0.201065  | C | -0.147184 | 0.526134  | -0.887502 | C | -2.825882 | -3.363273 | 0.985832  |
| B    | 4.872033 | 1.755334  | -1.463622 | H | -1.257115 | -0.101536 | -2.615095 | H | -4.771826 | -2.597908 | 0.532192  |
| B    | 4.917156 | -0.015189 | -1.608042 | C | 2.271653  | 0.725408  | -1.087259 | H | -0.753198 | -3.857327 | 1.371496  |
| B    | 4.141729 | 0.542870  | 1.005108  | H | 2.958937  | 0.360761  | -3.092548 | H | 1.475460  | 2.975896  | 4.007503  |
| H    | 5.872290 | -1.063993 | 1.983932  | C | -1.318008 | 0.611370  | 0.093062  | H | -5.056751 | 4.141336  | -1.643663 |
| H    | 6.700633 | -1.678840 | -0.858006 | C | 1.091264  | 0.885401  | -0.294129 | H | -3.205459 | -4.354400 | 1.216441  |
| H    | 8.051523 | 0.710577  | 0.639086  | C | -0.613896 | 1.191998  | 1.313738  | N | -4.184462 | -0.081962 | -0.104871 |
| H    | 5.830394 | 1.974313  | 2.350172  | C | -2.402526 | 1.570573  | -0.410913 | C | -5.585043 | -0.407647 | -0.163598 |
| H    | 3.291783 | 0.319160  | 1.779414  | C | -1.886973 | -0.784873 | 0.380267  | C | -6.135529 | -0.924457 | -1.340791 |
| H    | 4.602041 | -0.583447 | -2.585136 | C | 0.764268  | 1.392220  | 1.078819  | C | -6.393581 | -0.206096 | 0.959084  |
| H    | 7.188235 | 0.974693  | -2.314326 | C | -1.222401 | 1.559911  | 2.507880  | C | -7.494489 | -1.238990 | -1.392794 |
| H    | 6.652564 | 3.261182  | -0.326865 | C | -2.032844 | 2.866021  | -0.797905 | H | -5.496700 | -1.076019 | -2.205200 |
| H    | 3.689921 | 3.038809  | 0.435531  | C | -3.264553 | -1.068969 | 0.288526  | C | -7.752189 | -0.521903 | 0.903115  |
| H    | 4.481441 | 2.395173  | -2.378327 | C | -1.012830 | -1.807682 | 0.771938  | H | -5.953139 | 0.195707  | 1.866171  |
| C    | 3.799784 | -2.000990 | -0.015247 | C | 1.499122  | 2.070842  | 2.064480  | C | -8.303507 | -1.038268 | -0.271798 |
| C    | 3.252294 | -2.434135 | 1.203837  | C | -0.462577 | 2.184302  | 3.497056  | H | -7.919785 | -1.640052 | -2.307657 |
| C    | 3.671535 | -2.829661 | -1.141079 | H | -2.283441 | 1.380612  | 2.655250  | H | -8.378062 | -0.364574 | 1.776160  |
| C    | 2.587251 | -3.656216 | 1.289834  | C | -4.703506 | 2.156465  | -0.926412 | H | -9.360343 | -1.283445 | -0.313812 |
| H    | 3.355722 | -1.825348 | 2.093475  | C | -2.960993 | 3.800624  | -1.241993 | C | -3.761694 | 1.205517  | -0.476806 |
|      |          |           |           | H | -0.983673 | 3.141203  | -0.742616 | C | 0.853848  | 0.137061  | -3.018616 |
|      |          |           |           | C | -3.715901 | -2.370107 | 0.598781  | H | 0.787800  | -0.103338 | -4.074582 |

**Table S10** Cartesian coordinates of the first excited state ( $S_1$ ) fully optimized geometry in THF of *o*-SAC from B3LYP calculations (in Å)

| Atom | X        | Y         | Z         | C | 3.716656  | -4.305231 | -0.998567 | C | -1.319197 | -3.067798 | 0.735008  |
|------|----------|-----------|-----------|---|-----------|-----------|-----------|---|-----------|-----------|-----------|
| C    | 4.801428 | -0.789855 | -0.052148 | H | 4.684090  | -2.677917 | -2.011711 | H | 0.098924  | -1.463977 | 0.623294  |
| C    | 3.520124 | 1.172492  | -0.671893 | C | 3.152471  | -4.765044 | 0.194301  | C | 0.829426  | 2.223375  | 3.380010  |
| B    | 5.811616 | -0.138095 | 1.051507  | H | 2.707789  | -4.266491 | 2.245982  | H | 2.442999  | 2.243876  | 1.977638  |
| B    | 6.280266 | -0.431906 | -0.653013 | H | 3.746000  | -4.951685 | -1.871326 | H | -0.945718 | 2.116805  | 4.603421  |
| B    | 5.525380 | 1.593959  | 1.242960  | H | 2.740957  | -5.768062 | 0.257088  | C | -4.690501 | 3.393266  | -0.911104 |
| B    | 6.867930 | 1.011047  | 0.200056  | C | -0.452931 | 0.530257  | -2.293859 | H | -5.993414 | 1.709209  | -0.730580 |
| B    | 5.953529 | 2.428109  | -0.291984 | C | 1.917251  | 0.894707  | -2.521944 | H | -3.139615 | 4.895792  | -1.024773 |
| B    | 6.248155 | 1.121363  | -1.484181 | C | -0.302090 | 0.773680  | -0.937914 | C | -2.670028 | -3.439371 | 0.643212  |
| B    | 4.265270 | 2.305106  | 0.231160  | H | -1.421997 | 0.282892  | -2.715930 | H | -4.668703 | -2.770979 | 0.293281  |
| B    | 4.701014 | 1.975326  | -1.473701 | C | 2.113948  | 1.093264  | -1.132868 | H | -0.559238 | -3.811761 | 0.946066  |
| B    | 4.718326 | 0.127848  | -1.486484 | H | 2.786566  | 0.927066  | -3.165810 | H | 1.441460  | 2.647695  | 4.170315  |
| B    | 4.091606 | 0.522047  | 0.813007  | C | -1.439966 | 0.695296  | 0.090290  | H | -5.494718 | 4.077605  | -1.156065 |
| H    | 6.115654 | -0.814457 | 1.980962  | C | 0.931548  | 1.111529  | -0.330889 | H | -2.965256 | -4.472503 | 0.786293  |
| H    | 6.942780 | -1.337452 | -1.046676 | C | -0.725027 | 1.189732  | 1.354064  | N | -4.226240 | -0.182306 | -0.117619 |
| H    | 8.019763 | 1.105091  | 0.492659  | C | -2.589521 | 1.617666  | -0.272972 | C | -5.615762 | -0.608041 | -0.185003 |
| H    | 5.727324 | 2.081539  | 2.311815  | C | -1.887769 | -0.749062 | 0.269901  | C | -6.138770 | -1.035134 | -1.405567 |
| H    | 3.293527 | 0.234957  | 1.637157  | C | 0.639069  | 1.438592  | 1.094262  | C | -6.390439 | -0.577240 | 0.974574  |
| H    | 4.362005 | -0.430834 | -2.469709 | C | -1.303915 | 1.412553  | 2.596238  | C | -7.472662 | -1.441313 | -1.460734 |
| H    | 6.962957 | 1.280629  | -2.424413 | C | -2.339341 | 2.967043  | -0.521568 | H | -5.512217 | -1.048162 | -2.290964 |
| H    | 6.472905 | 3.500095  | -0.342741 | C | -3.251063 | -1.131515 | 0.173353  | C | -7.722759 | -0.986245 | 0.904686  |
| H    | 3.623298 | 3.231966  | 0.603933  | C | -0.946816 | -1.738755 | 0.551314  | H | -5.956567 | -0.239792 | 1.909812  |
| H    | 4.369327 | 2.633530  | -2.406753 | C | 1.407952  | 1.986181  | 2.130417  | C | -8.262467 | -1.417092 | -0.309174 |
| C    | 4.231925 | -2.153399 | 0.031621  | C | -0.513119 | 1.929801  | 3.625517  | H | -7.890860 | -1.775824 | -2.404145 |
| C    | 3.663613 | -2.633981 | 1.227943  | H | -2.357323 | 1.205038  | 2.762618  | H | -8.335442 | -0.966986 | 1.799698  |
| C    | 4.247232 | -3.019253 | -1.079497 | C | -4.974202 | 2.063549  | -0.672139 | H | -9.299035 | -1.734127 | -0.357754 |
| C    | 3.132611 | -3.920630 | 1.307531  | C | -3.366540 | 3.852226  | -0.837259 | C | -3.928295 | 1.160093  | -0.352008 |
| H    | 3.646455 | -1.992748 | 2.102430  | H | -1.318216 | 3.326564  | -0.464672 | C | 0.681886  | 0.633592  | -3.099037 |
|      |          |           |           | C | -3.628735 | -2.486788 | 0.366674  | H | 0.610413  | 0.486629  | -4.172391 |
